# Supplementary material for: Neurosurgical enhanced recovery after surgery (ERAS) programme for elective craniotomies: are patients satisfied with their experiences? A quantitative and qualitative analysis
Source: PubMed Central journal article supplement — BMJ Open. 2019 Nov 10;9(11):e028706. doi: 10.1136/bmjopen-2018-028706 (PMC6858174; doi:10.1136/bmjopen-2018-028706), 2019-11-10
Supplement: bmjopen-2018-028706.draft_revisions.pdf [file bmjopen-2018-028706.draft_revisions.pdf]

# BMJ Open

BMJ Open is committed to open peer review. As part of this commitment we make the peer review history of every article we publish publicly available.

When an article is published we post the peer reviewers' comments and the authors' responses online. We also post the versions of the paper that were used during peer review. These are the versions that the peer review comments apply to.

The versions of the paper that follow are the versions that were submitted during the peer review process. They are not the versions of record or the final published versions. They should not be cited or distributed as the published version of this manuscript.

BMJ Open is an open access journal and the full, final, typeset and author-corrected version of record of the manuscript is available on our site with no access controls, subscription charges or pay-per-view fees (<http://bmjopen.bmj.com>).

If you have any questions on BMJ Open's open peer review process please email [info.bmjopen@bmj.com](mailto:info.bmjopen@bmj.com)

# BMJ Open

**Neurosurgical enhanced recovery after surgery (ERAS)  
program for elective craniotomies: are patients satisfied  
with their experiences?  
A quantitative and qualitative analysis**

|                               |                                                                                                                                                                                                                                                                                               |
|-------------------------------|-----------------------------------------------------------------------------------------------------------------------------------------------------------------------------------------------------------------------------------------------------------------------------------------------|
| Journal:                      | <i>BMJ Open</i>                                                                                                                                                                                                                                                                               |
| Manuscript ID                 | bmjopen-2018-028706                                                                                                                                                                                                                                                                           |
| Article Type:                 | Research                                                                                                                                                                                                                                                                                      |
| Date Submitted by the Author: | 20-Dec-2018                                                                                                                                                                                                                                                                                   |
| Complete List of Authors:     | Liu, Bolin; Department of Neurosurgery<br>Liu, Shujuan<br>Wang, Yuan<br>Zhao, Binfang<br>Zhao, Tianzhi<br>Zhao, Lanfu<br>Lv, Wenhai<br>Zhang, Yufu<br>Zheng, Tao<br>Xue, Yafei<br>Chen, Lei<br>Chen, Long<br>Wu, Yingxi<br>gao, guodong<br>Qu, Yan<br>He, Shiming; Department of Neurosurgery |
| Keywords:                     | Quality in health care < HEALTH SERVICES ADMINISTRATION & MANAGEMENT, NEUROSURGERY, Neurological oncology < ONCOLOGY, QUALITATIVE RESEARCH                                                                                                                                                    |
|                               |                                                                                                                                                                                                                                                                                               |

SCHOLARONE™  
Manuscripts

1  
2  
3  
4 **Neurosurgical enhanced recovery after surgery (ERAS) program for elective**  
5 **craniotomies: are patients satisfied with their experiences?**

6  
7 **A quantitative and qualitative analysis**  
8  
9

10  
11  
12 Bolin Liu<sup>1,2\*</sup>, M.D., Ph.D., Shujuan Liu<sup>3\*</sup>, M.D., Ph.D., Yuan Wang<sup>1\*</sup>, M.D., Ph.D.,  
13  
14 Binfang Zhao<sup>1</sup>, B.S.N., Tianzhi Zhao<sup>1</sup>, M.D., Ph.D., Lanfu Zhao<sup>1</sup>, M.D., Wenhai Lv<sup>1</sup>,  
15  
16 M.D., Yufu Zhang<sup>1</sup>, M.D., Tao Zheng<sup>1</sup>, M.D., Yafei Xue<sup>1</sup>, M.D., Lei Chen<sup>1</sup>, M.D.,  
17  
18 Long Chen<sup>1</sup>, M.D., Yingxi Wu<sup>1</sup>, M.D., Guodong Gao<sup>1</sup>, M.D., Ph.D., Yan Qu<sup>1</sup>, M.D.,  
19  
20 Ph.D., Shiming He<sup>1,2†</sup>, M.D., Ph.D..  
21  
22  
23  
24  
25  
26  
27

28 <sup>1</sup>Department of Neurosurgery, Tangdu Hospital, Fourth Military Medical University,  
29  
30 Xi'an, Shaanxi Province, China.  
31

32  
33 <sup>2</sup>Department of Neurosurgery, Xi'an International Medical Center, Xi'an, Shaanxi  
34  
35 Province, China.  
36  
37

38  
39 <sup>3</sup>Department of Obstetrics and Gynecology, Xijing Hospital, Fourth Military Medical  
40  
41 University, Xi'an, Shaanxi Province, China.  
42  
43  
44  
45

46 \*These authors contributed equally to this work.  
47  
48  
49  
50

51 <sup>†</sup>Correspondence to: Shiming He, Department of Neurosurgery, Tangdu Hospital,  
52  
53 Fourth Military Medical University, No.569 Xinsi Road, Xi'an, Shaanxi Province,  
54  
55 710038, China. Tel & Fax +86-29-84717737; Email:he-shiming@163.com  
56  
57  
58  
59  
60

1  
2  
3  
4 **Key words:** Patient satisfaction, patient experience, enhanced recovery after surgery,  
5 fast-track surgery, neurosurgery, health care quality  
6  
7

8  
9 **Running title:** Patient experience in enhanced recovery after surgery program  
10  
11

12  
13  
14 **Patient consent for publication:** Obtained.  
15

#### 16 **Author Contributions**

17  
18 Conception and design: B Liu, S Liu, Y Wang, T Zhao, S He. Acquisition of data: B  
19 Liu, S Liu, Y Wang, B Zhao, L Zhao, W Lv, Y Zhang, T Zheng, Y Xue, L Chen, L  
20 Chen, Y Wu, S He. Analysis and interpretation of data: B Liu, S Liu, Y Wang, B  
21 Zhao, S He. Drafting the article: B Liu, S Liu, Y Wang, S He. Critically revising the  
22 article: B Liu, S Liu, Y Wang, T Zhao, L Zhao, W Lv, Y Zhang, T Zheng, Y Xue, L  
23 Chen, L Chen, Y Wu, G Gao, Y Qu, S He. Reviewed submitted version of  
24 manuscript: all. Approved the final version of the manuscript: all. Statistical analysis:  
25 B Liu, S Liu, Y Wang. Administrative/technical/material support: B Zhao, L Zhao, W  
26 Lv, Y Zhang, T Zheng, Y Xue, L Chen, L Chen, Y Wu, G Gao, Y Qu, S He. Study  
27 supervision: G Gao, Y Qu, S He.  
28  
29  
30  
31  
32  
33  
34  
35  
36  
37  
38  
39  
40  
41  
42  
43  
44

45 **Funding:** This work was supported by China Natural Science Foundation (81572470  
46 and 81802486).  
47  
48

49 **Conflict of interest:** None.  
50

51  
52 **Ethics approval:** Tangdu Hospital Ethics Board of Fourth Military Medical  
53 University.  
54  
55

56 **Data sharing statement:** Data available on request.  
57  
58  
59  
60

## Abstract

Object. The aim of this study was to evaluate the patient satisfaction and associated predictors of patient satisfaction at discharge as well as patient experience at 30-day follow-up in a neurosurgical enhanced recovery after surgery (ERAS) program.

Methods. In a single-center prospective randomized controlled study, 140 neurosurgical patients who were admitted for elective craniotomy were included and randomized into 2 groups: 70 patients received care according to a novel neurosurgical ERAS protocol (ERAS group), and 70 patients received conventional perioperative care (control group). Patient satisfaction at discharge was evaluated using a multi-modal questionnaire. A secondary analysis of patient experience in participating the ERAS program was conducted by a semi-structured qualitative interview via telephone at 30-day follow-up after discharge.

Results. Mean patient satisfaction was significantly higher in the ERAS group compared with control group at discharge ( $92.2 \pm 4.3$  vs.  $86.8 \pm 7.4$ ,  $P = 0.0001$ ). The most important predictors of patient satisfaction at discharge included age [odds ratio (OR) = 6.934], postoperative nausea and vomiting (PONV) visual analog scale (VAS) (OR = 0.184), absorbable skin suture (OR = 0.007), and postoperative length of stay (LOS) (OR = 0.765). Analysis on patients experience revealed 5 themes: information transfer, professional support, shared responsibility and active participation, readiness for discharge, and follow-up, all of which are closely related and represent positive and negative aspects.

Conclusions. Measures including decreasing PONV VAS, incorporating absorbable skin suture, and shortening LOS seems to increase patient satisfaction in a neurosurgical ERAS program. Analysis of the patient experience data highlights a number of aspects for consideration in achieving patient-centered and high-quality care. Further studies are warranted to standardize the assessment of patient satisfaction and experience in planning, employing and appraising ERAS programs.

## Strengths and limitations of this study

- The first study on patient satisfaction and experience in participating a neurosurgical ERAS program.
- A randomized controlled trial to evaluate patient satisfaction.
- Incorporate both quantitative and qualitative analysis.
- Qualitative analysis done solely for ERAS patients.

## Introduction

Enhanced recovery after surgery (ERAS) or fast-track surgery program, which was firstly proposed and applied by Kehlet in 1997, has been proven to benefit the patients with shortened hospital length of stay (LOS), improved functional recovery, decreased morbidity and health care costs in several surgical fields including colorectal surgery, urological surgery, orthopedic surgery, cardiac surgery and gynecological surgery.<sup>1-3</sup> Recently, our group had proposed the first neurosurgical ERAS protocol for patients undergoing elective craniotomy and had completed the first randomized controlled trial to evaluate its efficacy and safety.<sup>4</sup> Similar to previous studies, our ERAS program is a multidisciplinary, evidence-based protocol consisting of preoperative, intraoperative, and postoperative interventions as well as a discharge plan. Our results confirmed that implementation of the ERAS program was associated with significant reduction in postoperative LOS and acceleration of functional recovery, without increasing the complication or readmission/reoperation rates compared to conventional neurosurgical perioperative care.<sup>4</sup>

Despite these known objective benefits of ERAS programs that have been proven repeatedly, very few studies had emphasized the importance of patient satisfaction and experience in participating in such programs.<sup>3 5 6</sup> However, there is now a drive to apprehend the patients' perspective in evaluating quality of health care, which is considered to have equal importance as clinical effectiveness and patients' safety.<sup>3</sup>

Because of the paucity of studies on patient satisfaction and experience associated with the participation in an ERAS program, we have assessed the patient satisfaction at discharge and analyzed the predictive factors of patient satisfaction in elective craniotomy patients who had enrolled in a neurosurgical ERAS program in a

prospective randomized controlled study.

In addition, since patients' perception of comfort is as critical as objective goals of recovery in judging the effectiveness of medical care delivery, we have further incorporated a secondary analysis of patient experience in participating the ERAS program by a semi-structured qualitative interview via telephone at 30-day follow-up after discharge.

## **Methods**

### ***Patient Population***

Patients admitted for elective craniotomy at the Department of Neurosurgery of Tangdu Hospital (Xi'an, People's Republic of China) between October 2016 and July 2017 were included in the study of the neurosurgical ERAS program.<sup>4</sup> A total of 140 patients, aged 18 to 65 years-old, who had a single intracranial lesion and medically eligible for elective craniotomy were enrolled and randomly allocated to two groups. The ERAS group received care according to a novel neurosurgical ERAS protocol, which consists of patient evaluation, patient and family counseling, functional status evaluation, nutritional assessment, smoking and alcohol abstinence, antithrombotic prophylaxis, preoperative intestinal intervention, preoperative oral carbohydrate loading, microinvasive surgery, scalp incision anesthesia, nonopioid analgesia, absorbable skin suture, hypothermia avoidance, goal-directed fluid balance, postoperative management of pain and postoperative nausea and vomiting (PONV), early oral nutrition resumption, early ambulation, and so on. The control group received conventional perioperative care according to institutional practice patterns.<sup>4</sup>

### ***Assessment and Data Collection***

Demographic variables including age, sex, height, weight, body mass index (BMI), educational level, occupational status, marital status, primary diagnosis of intracranial diseases, American Society of Anesthesiology (ASA) grades and patient comorbidities (smoking, diabetes, hypertension, hypercholesterolemia, etc.) were recorded. Surgery-related variables including length of surgery/anesthesia, blood loss, blood transfusion, and fluid balance were documented as well. Variables associated

1  
2  
3  
4 with accelerated recovery regimen included PONV visual analogue scales VAS,  
5 preoperative carbohydrate loading, absorbable skin suture, mechanical prophylaxis  
6 for DVT, early removal of urinary catheter (within 6 h), oral solid intake on  
7 postoperative day (POD) 1, mobilization on POD 1, postoperative wound drainage,  
8 and pain management. Clinical outcome variables compromised postoperative LOS,  
9 total hospital LOS, readmission, reoperation, postoperative surgical and non-surgical  
10 complications, functional recovery (i.e. KPS) at discharge and 30-day follow-up.  
11  
12

13  
14  
15  
16  
17 A modified edition of a validated patient satisfaction questionnaire<sup>7</sup> consisting of 5  
18 modules with 20 questions was applied to assess patient satisfaction at discharge. A  
19 cross-sectional pilot study was done to validate the instrument, which showed  
20 acceptable internal reliability consistency (Cronbach's alpha exceeded 0.70 for all  
21 modules) and test-retest reliability (Weighted Kappa indexes ranged from 0.92 to 0.96,  
22 Inter-correlation coefficient ranged from 0.70 to 0.92). The modules incorporated  
23 information, medical care, nursing care, enhanced recovery, comfort & others, each of  
24 which consists of 4 questions (Additional file 1). Each question was answered using a  
25 1-5 point numerical scale, with higher points indicating higher levels of patient  
26 satisfaction: 1 = completely dissatisfied; 2 = moderately dissatisfied, 3= neutral, 4=  
27 moderately satisfied, 5= completely satisfied. A scoring scale between 0 and 100 was  
28 thus derived from the sum of scores for the individual questions, with 100 indicating  
29 the highest level of satisfaction. Educational level, professional status, and marital  
30 status were also recorded. An interviewer who was a rotated surgical resident that has  
31 not involved in the patient care and blinded to the patient allocation was appointed to  
32 fill in all questionnaires.  
33  
34  
35  
36  
37  
38  
39  
40  
41  
42  
43  
44  
45  
46  
47

48 The secondary assessment at 30-day follow-up after discharge was done via telephone  
49 interview. Only patients enrolled in the ERAS program were included in this part of  
50 study. Upon discharge an informed consent was obtained from each patient who  
51 wanted to participate. A semi-structured interview guide consisting of 6 domains  
52 (Additional file 2) was designed to start with a warm-up to greet the patients and  
53 assess the 30-day follow-up KPS. Open, broad questions were asked first to  
54 encourage the patients to describe their general feelings and experiences about the  
55  
56  
57  
58  
59  
60



1  
2  
3  
4 ERAS program. A series of questions addressing specific domains including  
5 information transfer, symptom management & accelerated recovery, and discharge &  
6 follow-up were then asked to determine possible problems and concerns. Finally,  
7 cool-down questions were asked to allow patients to add information that has not been  
8 discussed. All interviews were recorded and professionally transcribed verbatim for  
9 analysis.  
10  
11  
12  
13  
14

15 Local institutional review board approval was obtained to perform this study and to  
16 use archived material for research purposes. The registration number of this study is  
17 ChiCTR-INR-16009662, registered at the Chinese clinical trial registry  
18 (<http://www.chictr.org.cn/showproj.aspx?proj=16480>). The protocol adheres to the  
19 principles set forth in the US Code of Federal Regulations, Title 45, Part 46,  
20 Protection of Human Subjects, revised June 23, 2005, and the World Medical  
21 Association Declaration of Helsinki.  
22  
23  
24  
25  
26  
27  
28

### 29 ***Statistical Analysis***

30  
31 To test whether variables differed across groups, the chi-square test or Fisher exact  
32 test was used according to the testing condition. Comparisons between continuous  
33 data were done using ANOVA (with Scheffe's method for multiple comparisons) or  
34 Mann-Whitney U test (with Kruskal-Wallis test for multiple comparisons) according  
35 to the testing condition. Multinomial logistic regression was used to identify possible  
36 predictors of patient satisfaction. Statistical significance was defined as  $p < 0.05$ . All  
37 of the tests were 2-sided. Statistical analysis was performed using SPSS software  
38 (version 16.0, SPSS, Inc.).  
39  
40  
41  
42  
43  
44  
45

46 Qualitative data analysis of the secondary assessment at 30-day follow-up was done  
47 using interpretative phenomenological analysis (IPA) as previously described by  
48 Smith et al.<sup>8</sup> Briefly, the transcribed interviews were read and coded individually, and  
49 then discussed thoroughly by the research team to identify prominent themes. The  
50 process of analysis was done in parallel with the interview so that the developing  
51 themes could be tested with reference to new data. Similar themes were then grouped  
52 and combined to obtain the final themes. Finally, the themes were interpreted and  
53 explained to reveal general issues in common as well as unique features of each  
54  
55  
56  
57  
58  
59  
60

1  
2  
3  
4 individual regarding patients' experiences.

### 5 ***Patient and public involvement***

6  
7 No patients or members of the public were involved in the development and design of  
8  
9 this study. Patients and the general public will be informed of the study results via  
10  
11 peer-reviewed journals.  
12  
13

### 14 15 **Results**

16  
17 A total of 140 patients enrolled in the study and were randomized into 2 groups: 70  
18  
19 patients were allocated to the ERAS group receiving care according to the  
20  
21 neurosurgical ERAS protocol, and 70 patients were allocated to the control group  
22  
23 receiving conventional perioperative care. Demographic and clinical features did not  
24  
25 significantly differ between the two groups (Table 1). Details of surgery, accelerated  
26  
27 recovery regimen, and clinical outcomes were outlined in our previous report.<sup>4</sup>  
28  
29 Briefly, there was no significant difference of surgery-related variables between the  
30  
31 groups whereas all accelerated recovery regimen-related variables differed  
32  
33 significantly between the groups, which were in accordance with the ERAS protocol  
34  
35 (Table 2). Additionally, a shorter postoperative LOS (-3d,  $P < 0.0001$ ) was observed  
36  
37 in the ERAS group, which was associated with absorbable skin suture, oral solid  
38  
39 intake on POD 1, and no postoperative wound drainage in multivariate regression  
40  
41 analysis. There was no perioperative mortality, nor 30-day reoperation/readmission in  
42  
43 either group. There was no difference of surgical and non-surgical complications rates  
44  
45 between the groups. Functional recovery in terms of KPS scores at both discharge and  
46  
47 30-day follow-up were similar in the ERAS vs. control group.<sup>4</sup>

### 48 ***Patient satisfaction at discharge***

49  
50 All patients completed the questionnaire of patient satisfaction at discharge. Mean  
51  
52 patient satisfaction in the ERAS group was significantly higher than that in the control  
53  
54 group at discharge ( $92.2 \pm 4.3$  vs.  $86.8 \pm 7.4$ ,  $P = 0.0001$ ). Detailed patient satisfaction  
55  
56 scores according to each module are shown in Table 3.

57  
58 A predefined cut-off value of 90 classified the patients into "highly satisfied group"  
59  
60 (patient satisfaction score  $\geq 90$ ) and "not highly satisfied group" (score  $< 90$ ). Six

1  
2  
3  
4 (8.6%) and 37 patients (52.9%) were not highly satisfied in the ERAS and control  
5 group, respectively, which were significantly different ( $P < 0.0001$ ).  
6

7  
8 Univariate analysis including demographic, surgery-related, clinical, and ERAS  
9 regimen variables showed significant association between a higher overall patient  
10 satisfaction and the following parameters in the ERAS group: mild PONV VAS,  
11 absorbable skin suture, and mild pain VAS on POD1 (Supplemental Table 1). ASA  
12 grade I, absorbable skin suture, and shorter postoperative LOS (no more than 4 d)  
13 were related to higher satisfaction of medical care. Occupational status was correlated  
14 with nursing care, with the unemployed expressing higher satisfaction than those were  
15 employed and homemaker/student/retired. Mild pain VAS on POD1 also showed  
16 more satisfaction with nursing care. Four parameters consisting of PONV VAS,  
17 absorbable skin suture, mild pain VAS on POD1, and shorter postoperative LOS,  
18 were related to higher satisfaction with enhanced recovery. No variable was found to  
19 statistically correlated with satisfaction domains of information or comfort & others.  
20  
21 Multivariate logistic regression including variables with  $P < 0.20$  in the univariate  
22 analysis was done to identify independent predictors of higher overall patient  
23 satisfaction. Only ASA grade ( $\beta$  coefficient, 3.602; OR, 36.669; 95% CI,  
24 4.427-303.709;  $P=0.001$ ) was found to influence patient satisfaction significantly.  
25  
26

27  
28 On the other side, univariate analysis for the control group revealed ASA grade I as  
29 the only parameter associated with a higher overall patient satisfaction (data not  
30 shown). Older age ( $\geq 50$ ) and lower educational level (with no education or primary  
31 education) had a positive correlation with higher satisfaction with information.  
32 Factors including ASA grade I and mild PONV VAS were significantly related to  
33 higher satisfaction of medical care. ASA grade I was also related to higher satisfaction  
34 with nursing care as well as comfort & others. The results of multivariate analysis  
35 showed that age ( $\beta$  coefficient, 3.539; OR, 34.428; 95% CI, 2.497-474.715;  $P=0.008$ )  
36 and ASA grade ( $\beta$  coefficient, -3.454; OR, 0.032; 95% CI, 0.002-0.637;  $P=0.024$ )  
37 were the independent predictors for overall patient satisfaction.  
38

39  
40 When combining the two groups together, variables including mild PONV VAS,  
41 preoperative carbohydrate loading, absorbable skin suture, mechanical prophylaxis  
42  
43  
44  
45  
46  
47  
48  
49  
50  
51  
52  
53  
54  
55  
56  
57  
58  
59  
60

1  
2  
3  
4 for DVT, early removal of urinary drainage (within 6 h), oral solid intake on POD1,  
5 ambulation on POD1, no postoperative wound drainage, mild pain VAS on POD1,  
6 and shorter postoperative LOS all positively influenced overall patient satisfaction in  
7 univariate analysis (data not shown). These factors were also correlated with better  
8 satisfaction with medical care, nursing care, and enhanced recovery in univariate  
9 analysis. Nevertheless, age ( $\beta$  coefficient, 1.936; OR, 6.934; 95% CI, 1.886-25.489;  
10  $P=0.004$ ), PONV VAS ( $\beta$  coefficient, -1.692; OR, 0.184; 95% CI, 0.036-0.939;  
11  $P=0.042$ ), absorbable skin suture ( $\beta$  coefficient, -4.984; OR, 0.007; 95% CI,  
12 0.0002-0.281;  $P=0.009$ ), and postoperative LOS ( $\beta$  coefficient, -3.798; OR, 0.765;  
13 95% CI, 0.185-0.874;  $P=0.020$ ) were retained as the independent factors affecting  
14 patient satisfaction when multivariate analysis was used.

### 25 ***Patient experience at 30-day follow-up***

26  
27 A purposeful sample of 46 patients participated in the semi-structured interviews at  
28 30-day follow-up after discharge. Nineteen men and twenty-seven women aged 18-67  
29 years were interviewed. Of the 46 interviews, two were excluded from analysis  
30 because of poor quality of material. Patients' experiences in participating a  
31 neurosurgical ERAS program were organized into 5 final themes: information  
32 transfer, professional support, shared responsibility and active participation, readiness  
33 for discharge, and follow-up.

#### 40 *Information transfer*

41  
42 Most patients felt that they were well educated and counseled when they were  
43 enrolled for the ERAS program. However, some reported that too much information  
44 was given at the same time so that they were unable to remember everything, nor  
45 were they able to think over to raise questions (Table 4- 1). Therefore, it is preferable  
46 that the written information was provided one week before surgery.

#### 52 *Professional support*

53  
54 Most patients reported that they acknowledged that it was natural to experience  
55 pain/fatigue/nausea associated with surgery and anesthesia, and they were prepared  
56 for that in some extent. When they were enrolled for the ERAS program, they  
57 expected that the program may help in alleviating these discomfort postoperatively.  
58  
59  
60

1  
2  
3  
4 Even though the results have proved that more patients in the ERAS group reported  
5 mild pain on POD1 and shortened duration of pain than those in the control group,<sup>4</sup> a  
6 few patients were dissatisfied with the management of postoperative pain. The  
7 different degrees of satisfaction with postoperative pain management could be  
8 explained by the subjectivity of pain and individualized experiences of receiving and  
9 tolerating analgesia. However the patients mentioned that they did feel better when  
10 the caregivers showed great empathy and responded to their complains promptly and  
11 actively (Table 4- 2.1). In contrast, they felt worse when some caregivers simply  
12 assured them that “it was not uncommon” (Table 4- 2.2). It is valuable for the  
13 caregivers to contribute to a positive feeling. Similar issue existed concerning PONV  
14 (Table 4- 2.3).

15  
16  
17  
18  
19  
20  
21  
22  
23  
24  
25 Some patients also reported that the amount of attention they received declined  
26 significantly after the first couple of PODs. They felt that some caregivers did not  
27 behave patiently enough in listening and responding to their questions and concerns  
28 when they have undergone the most intense period postoperatively and seemed  
29 “stable” compared to other patients (Table 4- 2.4,2.5).

### 30 31 32 33 34 35 *Shared responsibility and active participation*

36  
37 Though all the patients were excited when they were educated preoperatively that  
38 they would be able to drink/eat and ambulate sooner than they expected after surgery,  
39 some showed a concern of “being obliged to do so” (Table 4- 3.1). Some felt that the  
40 process of accelerated recovery was designed by the caregivers and they were  
41 passively striving hard to meet the individual goals preset by the protocol which  
42 sometimes ended up with unpleasant experiences (Table 4- 3.2).

43  
44  
45  
46  
47  
48 In addition, some patients mentioned that they dislike the feeling of being told to  
49 follow the “rigid” instructions in their recovery process, instead it would be better if  
50 they could play a more active role in setting their own targets from day to day after  
51 surgery (Table 4- 3.3).

### 52 53 54 55 56 *Readiness for discharge*

57  
58 Many patients expressed their excitement with early discharge, which was also  
59 associated with reduced total cost of hospitalization<sup>4</sup> and faster return to normal life  
60

1  
2  
3  
4 and work. However a few felt that they were not ready to be discharged because a)  
5 they were still having mild symptoms (Table 4- 4.1, 4.2); b) they worried that their  
6 caretakers might not be able to take care of them at home as good as the caregivers  
7 did at the hospital (Table 4- 4.3); c) they felt that it would safer for them to stay in the  
8 hospital for a prolonged period of time if any late onset postoperative complications  
9 may occur (Table 4- 4.4, 4.5).  
10  
11  
12  
13  
14

#### 15 *Follow-up*

16  
17 All patients praised for the convenience in contacting their primary doctors and  
18 relatively prompt response to their questions post discharge in the current study  
19 (Table 4- 5). We have been using social media cellphone/website app to contact  
20 patient, answer questions, identify possible complications, provide guidance, arrange  
21 follow-up visits, and offer support to patients in a timely fashion. This doubtlessly  
22 helps patients to alleviate their worry about “being untended” and increase their sense  
23 of security upon early discharge.  
24  
25  
26  
27  
28  
29  
30  
31  
32

#### 33 **Discussion**

34  
35 In order to improve health care quality, thorough study of the target population is  
36 doubtlessly of great significance to meet the requirements and expectations of  
37 individual patients. Patient-oriented outcome measures including functional recovery  
38 (e.g. KPS) and patient satisfaction are employed for quality evaluation. We have  
39 validated the benefits of a neurosurgical ERAS program in shortening LOS of patients  
40 undergoing craniotomy without increasing complication rates.<sup>4</sup> The current study  
41 further proved that patients in the ERAS group had higher overall satisfaction as well  
42 as higher satisfaction with individual domains including information, medical care,  
43 nursing care, and enhanced recovery. Thus, it is possible to provide the patients with  
44 satisfactory information, care and treatment during a shortened hospital stay. This  
45 highly satisfaction perceived by the patients, which represents patient-based assurance  
46 of quality, should be considered as one of the most important end points for any study  
47 evaluating the quality of hospital stay associated with the interventions (such as an  
48 ERAS program).  
49  
50  
51  
52  
53  
54  
55  
56  
57  
58  
59  
60

1  
2  
3  
4 Multivariate analysis revealed that higher ASA grade was the only independent  
5 predictor of a higher patient satisfaction in the ERAS group, whereas older age and  
6 lower ASA grade were independent predictors in the control group. These predictors  
7 can be interpreted as determinants of patient satisfaction in each group under  
8 circumstances in which most other factors do not vary significantly within each  
9 group. It is also understandable that mild PONV VAS, absorbable skin suture, and  
10 shorter postoperative LOS, which are among the key distinguishing factors between  
11 the two groups, were independent predictors for patient satisfaction in all patients.  
12 Age was also a predictor for patient satisfaction in all patients, which is in accordance  
13 with previous studies showing that older patients tend to have higher satisfaction  
14 scores with hospital health care.<sup>9-11</sup>

15  
16 Intriguingly, ASA grade was shown to be a significant predictor of patient satisfaction  
17 in the ERAS and control group respectively with opposite direction of association; the  
18 lower ASA grade, the higher patient satisfaction in control group, whereas the higher  
19 ASA grade, the higher patient satisfaction in the ERAS group. In general, patient  
20 satisfaction appears to be higher in patients with better self-reported health status as  
21 shown in prior studies,<sup>10 11</sup> which is in accordance with the findings in the control  
22 group. On the other side, the benefits of the ERAS protocol may account for better  
23 satisfaction in patients with higher ASA grade. Satisfaction is a balance between  
24 patients' expectations for care and occurrence of care which is actually delivered,<sup>12</sup>  
25 and thus reflects changes in health status due to the effectiveness of hospital care. It is  
26 possible that for patients with higher ASA grade the ERAS-related interventions have  
27 made more profound change in self-perceived health status compared to those with  
28 lower ASA grade.

29  
30 Postoperative LOS was established as an independent predictor for patient satisfaction  
31 in all patients in the current study. In addition, it was also related to specific  
32 satisfaction domains such as medical care and enhanced recovery in the ERAS group  
33 as well as in all patients. The shorter the LOS, the higher the satisfaction, which  
34 seems rational and has been shown in other studies as well.<sup>9 11 13</sup>

35  
36 Bias associated with questionnaire surveys of satisfaction has been recognized as

1  
2  
3  
4 patients tend to overly positively score the care they received.<sup>14</sup> Furthermore,  
5 patients' explicitly positive attitude toward accelerated discharge actually masks their  
6 concerns and complaints.<sup>15</sup> Therefore patient experience data may provide with more  
7 information in assessing the quality of care to identify the circumstances surrounded  
8 the key ERAS components which make the patients satisfactory (or not) as well as the  
9 associated reasons.<sup>16</sup>

10  
11  
12  
13  
14  
15 In the absence of previous relevant study on patient experience in participating a  
16 neurosurgical ERAS program, we have conducted a secondary analysis of patient  
17 experience at 30-day follow-up after discharge. Based on our results, the 5 different  
18 themes were closely related to each other and represent both positive and negative  
19 sides. They showed shortcomings of care which warrant improvement in future as  
20 well as strong points which may be considered for generalization.

21  
22  
23  
24  
25  
26  
27 There is no doubt that information transfer the first and foremost step of incorporating  
28 patients into an ERAS program. It calls to attention the importance of having the  
29 ERAS conversation at least one week before surgery to allow the patients to have  
30 enough time to understand the process and raise questions. It was shown that  
31 receiving information at appropriate times improved patient satisfaction with their  
32 discharge planning.<sup>17 18</sup> This is practical for elective surgeries and should be adopted  
33 in future practices.

34  
35  
36  
37  
38  
39  
40 It is notable that emotional support from healthcare professionals is as crucial as  
41 medical interventions in symptom management. When facing dilemmas of  
42 burdensome symptoms and expectations for rapid recovery, the patients need to  
43 mobilize courage and will to follow the ERAS regimen. Though interventions  
44 associated with ERAS protocol have been proved to improve management of  
45 postoperative pain and PONV significantly,<sup>4</sup> it is perceived by patients from both  
46 previous studies<sup>17 19</sup> and ours that professional's empathy and supportive behavior  
47 function as decisive factors in accomplishing objectives of the ERAS program. In  
48 addition, as healthcare professionals are often enthusiastic in counseling the patients  
49 in the beginning of the study, it is important for them to being responsive to patients'  
50 need throughout the hospital stay.  
51  
52  
53  
54  
55  
56  
57  
58  
59  
60



1  
2  
3  
4 It was overlooked in the practice of current study that the patients need to take  
5 responsibilities for their own to achieve an accelerated recovery and good result. They  
6 should be encouraged to act more actively and set their own daily goals after surgery.  
7  
8 In addition to the shared responsibility and active participation required for the  
9 patients,<sup>1 19</sup> they also possess the right to adjust their goals based on their  
10 individualized conditions. The supportive role of caregivers should preferably be  
11 more like an assistant than a leader to hasten recovery.  
12  
13  
14  
15  
16

17 It remains a hot and tough issue of patients expressing insecurities about early  
18 discharge in several studies on patient experience of ERAS programs. The most  
19 common concerns were associated with pain management, mobilization, identifying  
20 postoperative complications and lack of family support.<sup>5 15 19 20</sup> Our patients  
21 mentioned all these concerns as well. However, our strategy of follow-up with social  
22 media cellphone/website app in a timely and responsive manner has proved to be  
23 effective in enhancing patients' sense of security and improving their experience after  
24 discharge. It is less manpower-relied compared to follow-up visits in person or via  
25 phone calls, and benefits the patients significantly. The patients felt that the healthcare  
26 providers were still reachable and responsive through the app after discharge. By  
27 using the app not only can the medical staffs track and collect follow-up data from the  
28 patients, but also can they answer patients' questions, address concerns, guide  
29 rehabilitation, identify possible newly onset complications and schedule clinic visits.  
30 Therefore patients' traditional beliefs of "safer and necessary prolonged  
31 convalescence at hospital" would no longer be a barrier to early discharge in the  
32 ERAS program.  
33  
34  
35  
36  
37  
38  
39  
40  
41  
42  
43  
44  
45  
46  
47

48 One limitation of the current study is that the findings from a single institution with  
49 sampled participants can not be automatically generalized. For one thing, sampling  
50 bias may exist. For another, the possible relationship of patients' views and their  
51 personal/domestic characteristics were not well studied in the qualitative analysis.  
52 Above all things, the views of patients in the control group who received conventional  
53 perioperative care were not taken into account in the qualitative analysis either.  
54  
55  
56  
57  
58  
59  
60 However, the quantitative analysis which showed higher patient satisfaction with the

ERAS program goes some towards validating the qualitative findings.

## Conclusions

Patients in the ERAS group demonstrated higher satisfaction compare with the controls. Factors including age, PONV VAS, absorbable skin suture, and postoperative LOS were independent predictors for overall patient satisfaction. Patients value adequate and consistent information transfer as well as professional support in participating an ERAS program. It is also important to encourage the patients to take active roles and take responsibilities for their own in accelerating recovery. Timely and responsive follow-up modality after discharge could enhance patients' sense of security. The findings of the current study may serve as a stepping stone to promote further research into the evaluation and validation of patient satisfaction and experience in order to improve service delivery and patient care.

## References

1. Kehlet H, Wilmore DW. Evidence-based surgical care and the evolution of fast-track surgery. *Annals of surgery* 2008;248(2):189-98. doi: 10.1097/SLA.0b013e31817f2c1a
2. Ljungqvist O, Scott M, Fearon KC. Enhanced Recovery After Surgery: A Review. *JAMA surgery* 2017;152(3):292-98. doi: 10.1001/jamasurg.2016.4952
3. Jones EL, Wainwright TW, Foster JD, et al. A systematic review of patient reported outcomes and patient experience in enhanced recovery after orthopaedic surgery. *Annals of the Royal College of Surgeons of England* 2014;96(2):89-94. doi: 10.1308/003588414X13824511649571
4. Wang Y, Liu B, Zhao T, et al. Safety and efficacy of a novel neurosurgical enhanced recovery after surgery protocol for elective craniotomy: a prospective randomized controlled trial. *J Neurosurg* 2018:1-12. doi: 10.3171/2018.1.JNS171552
5. Sibbern T, Bull Sellevold V, Steindal SA, et al. Patients' experiences of enhanced recovery after surgery: a systematic review of qualitative studies. *Journal of*

- 1  
2  
3  
4 *clinical nursing* 2017;26(9-10):1172-88. doi: 10.1111/jocn.13456
- 5  
6 6. Husted H, Holm G, Jacobsen S. Predictors of length of stay and patient satisfaction  
7 after hip and knee replacement surgery: fast-track experience in 712 patients.  
8  
9 *Acta orthopaedica* 2008;79(2):168-73. doi: 10.1080/17453670710014941
- 10  
11 7. Wang Y, Yu Z, Jin X, et al. The development and assessment of reliability and  
12 validity of patient satisfaction questionnaire. *J Nurs Train* 2013;28(6):533-36.
- 13  
14 8. Smith JA, Flowers P, Larkin M. Interpretative phenomenological analysis: theory,  
15 method and research. . London: Sage 2009.
- 16  
17 9. Quintana JM, Gonzalez N, Bilbao A, et al. Predictors of patient satisfaction with  
18 hospital health care. *BMC health services research* 2006;6:102. doi:  
19 10.1186/1472-6963-6-102
- 20  
21 10. Jaipaul CK, Rosenthal GE. Are older patients more satisfied with hospital care  
22 than younger patients? *Journal of general internal medicine* 2003;18(1):23-30.
- 23  
24 11. Nguyen Thi PL, Briancon S, Empereur F, et al. Factors determining inpatient  
25 satisfaction with care. *Social science & medicine* 2002;54(4):493-504.
- 26  
27 12. Linder-Pelz SU. Toward a theory of patient satisfaction. *Social science &*  
28 *medicine* 1982;16(5):577-82.
- 29  
30 13. Husted H, Hansen HC, Holm G, et al. What determines length of stay after total  
31 hip and knee arthroplasty? A nationwide study in Denmark. *Archives of*  
32 *orthopaedic and trauma surgery* 2010;130(2):263-8. doi:  
33 10.1007/s00402-009-0940-7
- 34  
35 14. Collins K, O'Cathain A. The continuum of patient satisfaction--from satisfied to  
36 very satisfied. *Social science & medicine* 2003;57(12):2465-70.
- 37  
38 15. Hunt GR, Hall GM, Murthy BV, et al. Early discharge following hip arthroplasty:  
39 patients' acceptance masks doubts and concerns. *Health expectations : an*  
40 *international journal of public participation in health care and health policy*  
41 2009;12(2):130-7. doi: 10.1111/j.1369-7625.2008.00522.x
- 42  
43 16. Foot C, Fitzsimons B. The policy and practice of measuring patient experience.  
44  
45 *Nursing management* 2011;18(3):18-9. doi:  
46 10.7748/nm2011.06.18.3.18.c8535
- 47  
48  
49  
50  
51  
52  
53  
54  
55  
56  
57  
58  
59  
60

- 1  
2  
3  
4 17. Aasa A, Hovback M, Bertero CM. The importance of preoperative information for  
5 patient participation in colorectal surgery care. *Journal of clinical nursing*  
6 2013;22(11-12):1604-12. doi: 10.1111/jocn.12110  
7  
8  
9 18. Fielden JM, Scott S, Horne JG. An investigation of patient satisfaction following  
10 discharge after total hip replacement surgery. *Orthopedic nursing*  
11 2003;22(6):429-36.  
12  
13  
14 19. Norlyk A, Harder I. After colonic surgery: The lived experience of participating in  
15 a fast-track programme. *International journal of qualitative studies on health*  
16 *and well-being* 2009;4:170-80. doi: 10.1080/17482620903027726  
17  
18  
19 20. Vandrevalla T, Senior V, Spring L, et al. 'Am I really ready to go home?': a  
20 qualitative study of patients' experience of early discharge following an  
21 enhanced recovery programme for liver resection surgery. *Supportive care in*  
22 *cancer : official journal of the Multinational Association of Supportive Care*  
23 *in Cancer* 2016;24(8):3447-54. doi: 10.1007/s00520-016-3158-6  
24  
25  
26  
27  
28  
29  
30  
31  
32  
33  
34  
35  
36  
37  
38  
39  
40  
41  
42  
43  
44  
45  
46  
47  
48  
49  
50  
51  
52  
53  
54  
55  
56  
57  
58  
59  
60

**Table 1. Sociodemographic and clinical features**

| Variable                     | ERAS group          | Control group | p Value |
|------------------------------|---------------------|---------------|---------|
|                              | No. of patients (%) |               |         |
| No. of patients              | 70                  | 70            |         |
| Age (years)                  |                     |               | 0.612   |
| <50                          | 33 (47.1)           | 36 (51.4)     |         |
| 50-65                        | 37 (52.9)           | 34 (48.6)     |         |
| Sex (Male/Female)            | 22/48               | 26/44         | 0.476   |
| BMI                          |                     |               | 0.617   |
| <18.5                        | 3 (4.3)             | 3 (4.3)       |         |
| 18.5 ~ 23.9                  | 47 (67.1)           | 52 (74.3)     |         |
| >24                          | 20 (28.6)           | 15 (21.4)     |         |
| Education                    |                     |               | 0.164   |
| No education                 | 4 (5.7)             | 0 (0)         |         |
| Primary school               | 8 (11.4)            | 5 (7.1)       |         |
| Secondary school/high school | 34 (48.6)           | 39 (55.7)     |         |
| College/more than college    | 24 (34.3)           | 26 (37.1)     |         |
| Occupation                   |                     |               | 0.352   |
| Employed                     | 29 (41.4)           | 31 (44.3)     |         |
| Homemaker                    | 18 (25.7)           | 14 (20.0)     |         |
| Unemployed                   | 12 (17.1)           | 19 (27.1)     |         |
| Student                      | 3 (4.3)             | 3 (4.3)       |         |
| Retired                      | 8 (11.4)            | 3 (4.3)       |         |
| Marital status               |                     |               | > 0.999 |
| Unmarried (Single/divorced)  | 5 (7.1)             | 5 (7.1)       |         |
| Married                      | 65 (92.9)           | 65 (92.9)     |         |
| ASA grades                   |                     |               | 0.410   |
| Grade I                      | 13 (18.6)           | 17 (24.3)     |         |
| Grade II                     | 57 (81.4)           | 53 (75.7)     |         |
| Intracranial lesions         |                     |               | 0.779   |
| Meningioma                   | 38 (54.3)           | 30 (42.9)     |         |
| Vestibular Schwannoma        | 7 (10.0)            | 9 (12.9)      |         |
| CPA epidermoid cyst          | 6 (8.6)             | 8 (11.4)      |         |
| Glioma                       | 13 (18.6)           | 18 (25.7)     |         |
| Trigeminal neuralgia         | 3 (4.3)             | 3 (4.3)       |         |
| Cavernous malformation       | 3 (4.3)             | 2 (2.9)       |         |

BMI = body mass index, ASA = American Society of Anesthesiologists', CPA = cerebellopontine angle

**Table 2. Variables associated with surgery and accelerated recovery regimen**

| Variable                              | ERAS group          | Control group | p Value |
|---------------------------------------|---------------------|---------------|---------|
|                                       | No. of patients (%) |               |         |
| No. of patients                       | 70                  | 70            |         |
| Length of procedure (hrs)             |                     |               | 0.180   |
| <3                                    | 15 (21.4)           | 22 (31.4)     |         |
| ≥3                                    | 55 (78.6)           | 48 (68.6)     |         |
| Blood loss during surgery (ml)        |                     |               | 0.310   |
| <300                                  | 30 (42.9)           | 36 (51.4)     |         |
| ≥300                                  | 40 (57.1)           | 34 (48.6)     |         |
| PONV VAS                              |                     |               | 0.115   |
| Mild (1-4)                            | 60 (85.7)           | 50 (71.4)     |         |
| Moderate (5-6)                        | 7 (10.0)            | 15 (21.4)     |         |
| Severe (7-10)                         | 3 (4.3)             | 5 (7.1)       |         |
| Preoperative carbohydrate loading     |                     |               | <0.0001 |
| Yes                                   | 64 (91.4)           | 0 (0)         |         |
| No                                    | 6 (8.6)             | 70 (100.0)    |         |
| Absorbable skin suture                |                     |               | <0.0001 |
| Yes                                   | 54 (77.1)           | 0 (0)         |         |
| No                                    | 16 (22.9)           | 70 (100.0)    |         |
| Mechanical prophylaxis for DVT        |                     |               | <0.0001 |
| Yes                                   | 45 (64.3)           | 11 (15.7)     |         |
| No                                    | 25 (35.7)           | 59 (84.3)     |         |
| Removal of urinary drainage (hrs)     |                     |               | <0.0001 |
| ≤6                                    | 52 (74.3)           | 0 (0)         |         |
| >6                                    | 18 (25.7)           | 70 (100.0)    |         |
| Time to first oral solid intake (hrs) |                     |               | <0.0001 |
| ≤24                                   | 38 (54.3)           | 12 (17.1)     |         |
| >24                                   | 32 (45.7)           | 58 (82.9)     |         |
| Ambulation on POD 1                   |                     |               | <0.0001 |
| Yes                                   | 45 (64.3)           | 0 (0)         |         |
| No                                    | 25 (35.7)           | 70 (100.0)    |         |
| Postoperative wound drainage          |                     |               | <0.0001 |
| No                                    | 58 (82.9)           | 2 (2.9)       |         |
| Yes                                   | 12 (17.1)           | 68 (97.1)     |         |
| Pain VAS on POD1                      |                     |               | <0.0001 |
| Mild (1-4)                            | 55 (78.6)           | 23 (32.9)     |         |
| Moderate (5-6)                        | 13 (18.6)           | 42 (60.0)     |         |
| Severe (7-10)                         | 2 (2.9)             | 5 (7.1)       |         |
| Postoperative LOS (d)                 |                     |               | <0.0001 |
| ≤4                                    | 32 (45.7)           | 7 (10.0)      |         |
| >4                                    | 38 (54.3)           | 63 (90.0)     |         |

DVT = deep vein thrombosis, LOS = length of stay, POD = postoperative day, PONV = postoperative nausea and vomiting, VAS = visual analog scale

**Table 3. Patient satisfaction scores at discharge**

| Variable             | ERAS group      | Control group   | p Value  |
|----------------------|-----------------|-----------------|----------|
|                      | Median (range)  |                 |          |
| Overall Satisfaction | 92.2 (85 ~ 100) | 86.8 (50 ~ 100) | 0.0001   |
| Information          | 17.4 (15 ~ 20)  | 16.5 (12 ~ 20)  | 0.039    |
| Medical care         | 18.9 (15 ~ 20)  | 18.3 (15 ~ 20)  | 0.043    |
| Nursing care         | 19.2 (17 ~ 20)  | 18.6 (15 ~ 20)  | 0.032    |
| Enhanced recovery    | 18.5 (15 ~ 20)  | 15.7 (10 ~ 20)  | < 0.0001 |
| Comfort & others     | 18.2 (14 ~ 20)  | 17.9 (12 ~ 20)  | 0.317    |

For peer review only

**Table 4. Quotes from patients**

| Theme                   | Quotes                                                                                                                                                                                                                                                                                                                                                                                                                                                                                                                                                                                                                                                                                                                                                                                                                                                                                                                                                                                                                                                                                                                                                                                                                                                                                                                                                                                                                                                                                                                                                                                                                                                                                                                                                |
|-------------------------|-------------------------------------------------------------------------------------------------------------------------------------------------------------------------------------------------------------------------------------------------------------------------------------------------------------------------------------------------------------------------------------------------------------------------------------------------------------------------------------------------------------------------------------------------------------------------------------------------------------------------------------------------------------------------------------------------------------------------------------------------------------------------------------------------------------------------------------------------------------------------------------------------------------------------------------------------------------------------------------------------------------------------------------------------------------------------------------------------------------------------------------------------------------------------------------------------------------------------------------------------------------------------------------------------------------------------------------------------------------------------------------------------------------------------------------------------------------------------------------------------------------------------------------------------------------------------------------------------------------------------------------------------------------------------------------------------------------------------------------------------------|
| 1. Information transfer | <p>1.1 “Well you know it’s a good thing but there’s simply too much information out there. So I said to myself ok just let the doctors and nurses tell me what to do next. I’ll follow the instructions as long as I know they mean good.” (#6)</p> <p>1.2 “They spent quite some time to explain the document point by point. It sounds great. Everybody wants a better outcome. Then they asked me if I had any questions. Well I could not think of any right away. They said I would keep one copy of the documents and I’m welcomed to ask questions at any time. But later on the nurses came for the pre-op stuff, then the barber, then the anesthetist, and the OR nurses. I was preoccupied with the surgery I didn’t even give them a second look. It would be better if they gave me the documents some time earlier rather than only two days before surgery.” (#9)</p>                                                                                                                                                                                                                                                                                                                                                                                                                                                                                                                                                                                                                                                                                                                                                                                                                                                                  |
| 2. Professional support | <p>2.1 “They gave me a patient-controlled analgesia pump for the first couple of days after surgery and it really helped a lot. I didn’t feel much pain at that time. But things changed the third day when they switched the pump to oral painkillers. It seemed to me that the oral painkillers helped little. I didn’t expect that I’d suffered from surgical pain starting on POD3. Of course I asked for help. Then came this very patient and intellectual nurse. She spent some time to explain to my family and me about the necessity of switching the pump to oral pills. She also told us that the drug used in the pump was the similar type as the oral ones. She mentioned in the end that she could ask the doctors to refill my pump if I really need that. Then I thought well, if I want to go home early I can not rely on the pump. I didn’t refill the pump and the pain did subside as time went by. Also, she checked on me later that day before the shift of duty and the next morning the first thing she came to the ward. I was able to be discharged a couple of days later, going home with oral painkillers. I was very thankful to her.” (#29)</p> <p>2.2 “I knew it was natural to had pain because of the surgery but it was intense. I expected the doctor to do something but he just told me ‘It is not uncommon. If I were you I’d have the pain too.’ It was not helping.” (#26)</p> <p>2.3 “The smell of food made me really nausea and I didn't want to eat at all. I called the nurse and then she called in a doctor. He checked my order of drugs and said they already give me drugs for the nausea and it was natural because there’s certainly some swelling in my brain due to the surgery.” (#5)</p> |



3. Shared  
responsibility and  
active participation

2.4 “It felt like that they really wanted me to join the program and they really wanted to make sure that I met the milestones. Removal of urinary drain, oral liquid and then solid food intake, off-bed activity... I thought I did everything great. I was proud of myself and grateful to the healthcare team. But after that I felt like I was abandoned. They were probably busy helping others who were not doing great as I did...” (#40)

2.5 “In the beginning when the nurses had their shifts in front of my bed they would remind each other ‘this is an ERAS patient’ and I know it means something different. I can tell that they paid more attention to me than to other patients... Later on they were talking like ‘this is an ERAS patient and he already got off bed yesterday’ Then I became the one who doesn't deserve their attention.” (#13)

3.1 “You signed the consent and you made a commitment. You are obliged to stay strong and comply with the rules. It is a sort of pressure.” (#40)

3.2 “The second afternoon after I had my surgery the nurse came in to remind me that it was time for me to get off bed and try to walk according to the schedule. Yes I could fetch my meals and they had removed the drip. But I was not feeling well enough. I had some faintness. I asked ‘maybe we can try tomorrow morning?’ but she kept telling me that how other managed to walk on the second day after surgery and that ‘nobody was ready enough for that’. I didn’t want to annoy her so I tried. I could not recall what happened next because I passed out. She was scared of course. She came to apologize to me the next day. I don’t blame her personally but they should have a mechanism to adjust the goal and not to take them as fixed rules.” (#25)

3.3 “A nurse came in and she shouted ‘how come you’re still in bed? You don’t have any IV fluids today and now try to walk’. But I already walked and I even walked two rounds in the corridor earlier that morning. She did not come early enough to see that... I’m not a soldier to follow the rigid instructions as when to do what.” (#15)

4. Readiness for  
discharge

4.1 “When he [resident] reported to the senior doctor that ‘she’s going to be discharged today’ I thought what’s going on, he must be insane. I was not well enough. I’m stilling having this right facial paralysis. I still can’t close my right eye tightly” (#20)

4.2 “I was happy to go home only 3 days after surgery, but I wasn’t totally pain free at that time. I couldn’t help thinking maybe I should stay for another couple of days and then go home in a better condition?” (#9)

1  
2  
3  
4  
5 4.3 “Here in the hospital my son and daughter are around. They are using their annual leave for my hospitalization.  
6 But once I go home they’ll have their own family and children to look after... They live quite far away... My  
7 husband, he has never done any housework at home. If I don’t cook, he will starve. How can you expect him to take  
8 care of me?” (#7)  
9

10 4.4 “My daughter really devoted herself to helping me recover from the surgery and I know that she wanted me home.  
11 But she is not a nurse anyway. I simply believe that it is safer to stay in the hospital. You are surrounded by medical  
12 staff so if there’s anything going wrong they will find it out and deal with it quickly.” (#23)  
13

14 4.5 “I don’t trust the community hospitals and I will certainly go back to the hospital where I had my surgery if  
15 anything is wrong. I’m not living close to the hospital. And I know that it’s a busy center and there is a huge number  
16 of patients to be admitted. What if they can’t guarantee a bed if I need readmission?” (#40)  
17

18 5.1 “This cell phone app works way much better than phone calls. I never called the ward even though I had the  
19 number. You never know whether the people answers the phone really know whom you are. But it is the doctor who  
20 did my surgery and took care of me that is now interacting with me on this app. He knows my condition.” (#20)  
21

22 5.2 “I know that the doctors are always busy doing the surgeries and dealing with new patients so you don’t want to  
23 bother them in the middle of their work. I just left a message to my doctor and whenever he got time he would reply or  
24 call back. In this way my questions are answered and I don’t feel myself as a burden to him.” (#9)  
25

## 5. Follow-up

26 5.3 “The third day after I went home I had a funny feeling around the wound. There was a small lump next to the  
27 wound which felt soft. My son took a picture of that with his cell phone and sent it to the doctors. They called me to  
28 go to the clinic. It turned out that I developed some water under the scalp and they fixed it easily. That was  
29 unimaginably convenient.” (#21)  
30  
31

---

**Supplemental Table 1. Univariate analysis for predictors of satisfaction in the ERAS group**

| Variable                | Patient satisfaction  |            |                       |            |                       |            |                       |            |                       |            |                       |            |
|-------------------------|-----------------------|------------|-----------------------|------------|-----------------------|------------|-----------------------|------------|-----------------------|------------|-----------------------|------------|
|                         | Overall Satisfaction  |            | Information           |            | Medical care          |            | Nursing care          |            | Enhanced recovery     |            | Comfort & others      |            |
|                         | Mean<br>(95% CI)      | P<br>value |
| Age (yrs)               |                       | 0.332      |                       | 0.070      |                       | 0.915      |                       | 0.784      |                       | 0.852      |                       | 0.650      |
| <50                     | 91.6 (89.7<br>~ 93.5) |            | 16.9 (16.1<br>~ 17.6) |            | 19.0 (18.5<br>~ 19.4) |            | 19.1 (18.7<br>~ 19.5) |            | 18.5 (17.7<br>~ 19.2) |            | 18.1 (17.5<br>~ 18.8) |            |
| ≥50                     | 92.8 (91.0<br>~ 94.7) |            | 17.8 (17.1<br>~ 18.5) |            | 18.9 (18.3<br>~ 19.5) |            | 19.2 (18.8<br>~ 19.6) |            | 18.5 (17.9<br>~ 19.2) |            | 18.3 (17.7<br>~ 18.9) |            |
| Sex                     |                       | 0.770      |                       | 0.865      |                       | 0.614      |                       | 0.522      |                       | 0.757      |                       | 0.639      |
| Male                    | 92.5 (89.6<br>~ 95.4) |            | 17.5 (16.2<br>~ 18.7) |            | 19.1 (18.4<br>~ 19.8) |            | 19.3 (18.7<br>~ 19.9) |            | 18.6 (17.7<br>~ 19.6) |            | 18.1 (17.0<br>~ 19.1) |            |
| Female                  | 92.1 (90.7<br>~ 93.6) |            | 17.4 (16.8<br>~ 17.9) |            | 18.9 (18.5<br>~ 19.3) |            | 19.1 (18.8<br>~ 19.4) |            | 18.5 (17.9<br>~ 19.0) |            | 18.3 (17.8<br>~ 18.8) |            |
| Education               |                       | 0.795      |                       | 0.525      |                       | 0.142      |                       | 0.864      |                       | 0.623      |                       | 0.187      |
| No<br>education/Primary | 91.9 (87.4<br>~ 96.3) |            | 17.8 (16.2<br>~ 19.4) |            | 18.4 (17.0<br>~ 19.8) |            | 19.1 (18.6<br>~ 19.7) |            | 18.3 (17.4<br>~ 19.4) |            | 18.4 (17.4<br>~ 19.4) |            |
| Secondary/College       | 92.3 (91.0<br>~ 93.7) |            | 17.3 (16.8<br>~ 17.9) |            | 19.1 (18.7<br>~ 19.4) |            | 19.2 (18.9<br>~ 19.5) |            | 18.2 (17.7<br>~ 18.7) |            | 18.2 (17.7<br>~ 18.7) |            |
| Occupation              |                       | 0.280      |                       | 0.624      |                       | 0.105      |                       | 0.019      |                       | 0.955      |                       | 0.485      |
| Employed                | 92.9 (90.9<br>~ 94.9) |            | 17.4 (16.6<br>~ 18.3) |            | 19.4 (19.0<br>~ 19.8) |            | 19.3 (18.9<br>~ 19.7) |            | 18.4 (17.6<br>~ 19.2) |            | 18.4 (17.6<br>~ 19.1) |            |
| Unemployed              | 93.5 (89.2<br>~ 97.8) |            | 17.9 (16.2<br>~ 19.6) |            | 18.8 (17.6<br>~ 19.9) |            | 19.8 (19.4<br>~ 20.1) |            | 18.5 (17.0<br>~ 20.0) |            | 18.6 (17.5<br>~ 19.7) |            |

|                                   |                          |                       |                       |                       |                       |                       |
|-----------------------------------|--------------------------|-----------------------|-----------------------|-----------------------|-----------------------|-----------------------|
| Homemaker/<br>Student/Retired     | 91.0<br>(91.0 ~<br>93.5) | 17.2 (16.4<br>~ 17.9) | 18.6 (18.0<br>~ 19.2) | 18.9 (18.4<br>~ 19.2) | 18.6 (17.9<br>~ 19.3) | 18.0 (17.3<br>~ 18.6) |
| Marital status                    | 0.653                    | 0.779                 | 0.689                 | 0.305                 | 0.183                 | 0.602                 |
| Unmarried<br>(Single/divorced)    | 93.3 (79.0<br>~ 107.7)   | 17.7 (11.4<br>~ 23.9) | 18.7 (15.8<br>~ 21.5) | 18.7 (14.9<br>~ 22.5) | 19.7 (18.2<br>~ 21.1) | 18.7 (14.9<br>~ 22.5) |
| Married                           | 92.2 (90.9<br>~ 93.5)    | 17.4 (16.9<br>~ 17.9) | 19.0 (18.6<br>~ 19.3) | 19.2 (19.0<br>~ 19.5) | 18.4 (17.9<br>~ 18.9) | 18.2 (17.8<br>~ 18.7) |
| ASA grades                        | 0.124                    | 0.611                 | 0.004                 | 0.119                 | 0.851                 | 0.595                 |
| Grade I                           | 90.3 (88.3<br>~ 92.4)    | 17.1 (15.9<br>~ 18.3) | 17.9 (16.8<br>~ 18.9) | 18.8 (18.0<br>~ 19.5) | 18.4 (17.1<br>~ 19.8) | 18.1 (17.5<br>~ 18.7) |
| Grade II                          | 92.8 (91.2<br>~ 94.4)    | 17.4 (16.8<br>~ 18.1) | 19.1 (18.8<br>~ 19.5) | 19.3 (19.0<br>~ 19.6) | 18.6 (18.0<br>~ 19.1) | 18.4 (17.9<br>~ 18.9) |
| Length of<br>procedure (hrs)      | 0.493                    | 0.738                 | 0.384                 | 0.195                 | 0.313                 | 0.903                 |
| <3                                | 91.0 (86.8<br>~ 95.2)    | 17.5 (16.0<br>~ 19.0) | 18.5 (17.2<br>~ 19.8) | 18.8 (17.9<br>~ 19.6) | 18.0 (16.2<br>~ 19.8) | 18.3 (17.3<br>~ 19.2) |
| ≥3                                | 92.2 (90.7<br>~ 93.7)    | 17.3 (16.6<br>~ 17.9) | 18.9 (18.5<br>~ 19.3) | 19.2 (18.9<br>~ 19.5) | 18.6 (18.1<br>~ 19.2) | 18.2 (17.6<br>~ 18.7) |
| Blood loss during<br>surgery (ml) | 0.973                    | 0.564                 | 0.496                 | 0.054                 | 0.685                 | 0.693                 |
| <300                              | 92.3 (90.0<br>~ 94.6)    | 17.6 (16.7<br>~ 18.5) | 18.8 (18.2<br>~ 19.4) | 19.0 (18.5<br>~ 19.4) | 18.6 (17.8<br>~ 19.4) | 18.4 (17.8<br>~ 19.0) |
| ≥300                              | 92.3 (90.7<br>~ 94.0)    | 17.3 (16.6<br>~ 18.0) | 19.0 (18.6<br>~ 19.5) | 19.4 (19.1<br>~ 19.7) | 18.4 (17.8<br>~ 19.0) | 18.2 (17.6<br>~ 18.8) |

|    |                     |            |            |            |            |            |            |       |
|----|---------------------|------------|------------|------------|------------|------------|------------|-------|
| 1  |                     |            |            |            |            |            |            |       |
| 2  |                     |            |            |            |            |            |            |       |
| 3  |                     |            |            |            |            |            |            |       |
| 4  |                     |            |            |            |            |            |            |       |
| 5  | PONV VAS            |            | 0.036      | 0.359      | 0.142      | 0.134      | 0.011      | 0.809 |
| 6  | Mild (1-4)          | 92.8 (91.5 | 17.5 (16.9 | 19.1 (18.7 | 19.3 (19.0 | 18.8 (18.4 | 18.3 (17.8 |       |
| 7  |                     | ~ 94.1)    | ~ 18.1)    | ~ 19.4)    | ~ 19.5)    | ~ 19.2)    | ~ 18.7)    |       |
| 8  | Moderate            | 89.4 (85.3 | 16.9 (15.2 | 18.4 (17.0 | 18.8 (17.8 | 17.3 (15.2 | 18.1 (16.9 |       |
| 9  | (5-6)/Severe (7-10) | ~ 93.5)    | ~ 18.5)    | ~ 19.8)    | ~ 19.7)    | ~ 19.3)    | ~ 19.3)    |       |
| 10 |                     |            |            |            |            |            |            |       |
| 11 | Preoperative        |            | 0.684      | 0.446      | 0.853      | 0.196      | 0.363      | 0.516 |
| 12 | carbohydrate        |            |            |            |            |            |            |       |
| 13 | loading             |            |            |            |            |            |            |       |
| 14 |                     |            |            |            |            |            |            |       |
| 15 | Yes                 | 92.1 (90.8 | 17.3 (16.8 | 19.0 (18.6 | 19.1 (18.8 | 18.6 (18.1 | 18.2 (17.7 |       |
| 16 |                     | ~ 93.5)    | ~17.9)     | ~19.3)     | ~ 19.4)    | ~ 19.1)    | ~18.7)     |       |
| 17 | No                  | 92.9 (88.3 | 17.9 (16.4 | 18.9 (17.5 | 19.6 (19.1 | 18.0 (16.3 | 18.6 (17.4 |       |
| 18 |                     | ~ 97.4)    | ~ 19.3)    | ~ 20.2)    | ~ 20.1)    | ~ 19.7)    | ~19.8)     |       |
| 19 |                     |            |            |            |            |            |            |       |
| 20 | Absorbable skin     |            | 0.071      | 0.977      | 0.004      | 0.543      | 0.011      | 0.982 |
| 21 | suture              |            |            |            |            |            |            |       |
| 22 |                     |            |            |            |            |            |            |       |
| 23 | Yes                 | 92.8 (91.4 | 17.4 (16.8 | 19.2 (18.8 | 19.2 (18.9 | 18.8 (18.3 | 18.3 (17.7 |       |
| 24 |                     | ~ 94.2)    | ~18.0)     | ~ 19.5)    | ~ 19.5)    | ~ 19.2)    | ~ 18.8)    |       |
| 25 | No                  | 89.8 (86.9 | 17.4 (15.9 | 17.9 (16.6 | 19.0 (18.4 | 17.3 (15.8 | 18.3 (17.7 |       |
| 26 |                     | ~ 92.6)    | ~ 18.9)    | ~ 19.2)    | ~ 19.6)    | ~ 18.7)    | ~ 18.8)    |       |
| 27 |                     |            |            |            |            |            |            |       |
| 28 | Mechanical          |            | 0.724      | 0.695      | 0.553      | 0.787      | 0.422      | 0.693 |
| 29 | prophylaxis for     |            |            |            |            |            |            |       |
| 30 | DVT                 |            |            |            |            |            |            |       |
| 31 |                     |            |            |            |            |            |            |       |
| 32 | Yes                 | 92.3 (90.6 | 17.4 (16.7 | 19.0 (18.6 | 19.2 (18.9 | 18.4 (17.8 | 18.3 (17.7 |       |
| 33 |                     | ~ 94.0)    | ~18.1)     | ~ 19.4)    | ~ 19.6)    | ~ 19.0)    | ~ 18.9)    |       |
| 34 | No                  | 92.8 (90.7 | 17.6 (16.7 | 18.8 (18.1 | 19.2 (18.7 | 18.8 (18.0 | 18.4 (17.9 |       |
| 35 |                     | ~ 94.9)    | ~ 18.5)    | ~ 19.5)    | ~ 19.6)    | ~ 19.5)    | ~ 19.0)    |       |
| 36 |                     |            |            |            |            |            |            |       |
| 37 |                     |            |            |            |            |            |            |       |
| 38 |                     |            |            |            |            |            |            |       |
| 39 |                     |            |            |            |            |            |            |       |
| 40 |                     |            |            |            |            |            |            |       |
| 41 |                     |            |            |            |            |            |            |       |
| 42 |                     |            |            |            |            |            |            |       |
| 43 |                     |            |            |            |            |            |            |       |
| 44 |                     |            |            |            |            |            |            |       |
| 45 |                     |            |            |            |            |            |            |       |
| 46 |                     |            |            |            |            |            |            |       |

|                                       |                    |                    |                    |                    |                    |                    |       |
|---------------------------------------|--------------------|--------------------|--------------------|--------------------|--------------------|--------------------|-------|
| Removal of urinary drainage (hrs)     |                    | 0.421              | 0.298              | 0.777              | 0.240              | 0.816              | 0.664 |
| ≤6                                    | 91.9 (90.5 ~93.4)  | 17.2 (16.6 ~ 17.8) | 19.0 (18.5 ~ 19.4) | 19.1 (18.8 ~ 19.4) | 18.5 (17.9 ~ 19.0) | 18.2 (17.7 ~ 18.8) |       |
| >6                                    | 93.1 (90.2 ~ 96.0) | 17.8 (16.7 ~ 18.9) | 18.9 (18.3 ~ 19.5) | 19.4 (19.1 ~ 19.8) | 18.6 (17.7 ~ 19.5) | 18.4 (17.7 ~ 19.1) |       |
| Time to first oral solid intake (hrs) |                    | 0.947              | 0.709              | 0.559              | 0.434              | 0.399              | 0.549 |
| ≤24                                   | 92.2 (90.4 ~ 94.0) | 17.5 (16.8 ~ 18.2) | 18.8 (18.3 ~ 19.4) | 19.1 (18.7 ~ 19.5) | 18.7 (18.1 ~ 19.3) | 18.1 (17.5 ~ 18.7) |       |
| >24                                   | 92.3 (90.3 ~ 94.3) | 17.3 (16.4 ~ 18.1) | 19.1 (18.6 ~ 19.5) | 19.3 (18.9 ~ 19.6) | 18.3 (17.5 ~ 19.1) | 18.4 (17.7 ~ 19.0) |       |
| Ambulation on POD 1                   |                    | 0.996              | 0.774              | 0.821              | 0.483              | 0.630              | 0.542 |
| Yes                                   | 92.2 (90.6 ~ 93.9) | 17.5 (16.8 ~ 18.1) | 19.0 (18.5 ~ 19.5) | 19.1 (18.7 ~ 19.5) | 18.6 (18.0 ~ 19.2) | 18.1 (17.6 ~ 18.7) |       |
| No                                    | 92.2 (90.0 ~ 94.5) | 17.3 (16.4 ~ 18.2) | 18.9 (18.3 ~ 19.4) | 19.3 (19.0 ~ 19.6) | 18.4 (17.5 ~ 19.2) | 18.4 (17.7 ~ 19.1) |       |
| Postoperative wound drainage          |                    | 0.246              | 0.977              | 0.142              | 0.864              | 0.081              | 0.809 |
| No                                    | 92.6 (91.2 ~ 94.0) | 17.4 (16.8 ~ 18.0) | 19.1 (18.7 ~ 19.4) | 19.2 (18.9 ~ 19.5) | 18.7 (18.2 ~ 19.2) | 18.3 (17.8 ~ 18.8) |       |
| Yes                                   | 90.6 (87.1 ~ 94.1) | 17.4 (16.0 ~ 18.7) | 18.4 (17.5 ~ 19.3) | 19.1 (18.6 ~ 19.7) | 17.6 (16.4 ~ 18.9) | 18.1 (17.2 ~ 19.1) |       |

|                                 |                       |                       |                       |                       |                       |                       |       |
|---------------------------------|-----------------------|-----------------------|-----------------------|-----------------------|-----------------------|-----------------------|-------|
| Pain VAS on                     |                       | 0.006                 | 0.853                 | 0.054                 | 0.001                 | 0.020                 | 0.067 |
| POD1                            |                       |                       |                       |                       |                       |                       |       |
| Mild (1-4)                      | 93.1 (91.7<br>~ 94.5) | 17.4 (16.8<br>~18.0)  | 19.1 (18.8<br>~19.5)  | 19.4 (19.1<br>~ 19.7) | 18.8 (18.3<br>~ 19.3) | 18.4 (18.0<br>~18.9)  |       |
| Moderate<br>(5-6)/Severe (7-10) | 89.0 (86.7<br>~ 91.3) | 17.3 (16.3<br>~ 18.3) | 18.3 (17.2<br>~ 19.4) | 18.4 (18.0<br>~ 18.8) | 17.5 (16.3<br>~ 18.7) | 17.5 (16.4<br>~ 18.6) |       |
| Postoperative LOS<br>(d)        |                       | 0.219                 | 0.971                 | 0.017                 | 0.829                 | 0.045                 | 0.837 |
| ≤4                              | 93.1 (91.0<br>~ 95.2) | 17.4 (16.6<br>~ 18.2) | 19.4 (19.0<br>~ 19.8) | 19.2 (18.7<br>~ 19.6) | 19.0 (18.4<br>~ 19.6) | 18.2 (17.4<br>~ 19.0) |       |
| >4                              | 91.5 (90.0<br>~ 93.2) | 17.4 (16.7<br>~ 18.1) | 18.6 (18.0<br>~ 19.1) | 19.2 (18.9<br>~ 19.5) | 18.1 (17.4<br>~ 18.8) | 18.3 (17.8<br>~ 18.8) |       |

ASA = American Society of Anesthesiologists', DVT = deep vein thrombosis, LOS = length of stay, POD = postoperative day, PONV = postoperative nausea and vomiting, VAS = visual analog scale

1  
2  
3 Additional file 1 Summary of the questions included in the patient satisfaction  
4 questionnaire at discharge.  
5

6 Module 1- Information

- 7 - Information delivery
- 8 - Patient counseling
- 9 - Doctors' and nurses' interest in patients' questions
- 10 - Contradictory orders
- 11
- 12

13 Module 2- Medical care

- 14 - Experience of operation
- 15 - Doctors' rounds
- 16 - Postoperative symptom management
- 17 - Explanations about health condition & treatment
- 18

19 Module 3- Nursing care

- 20 - Preoperative preparation
- 21 - Postoperative nursing care
- 22 - Nurses' empathy
- 23 - Response to patient/family need
- 24

25 Module 4- Enhanced recovery

- 26 - Nutritional intervention
- 27 - Functional recovery assistance
- 28 - Discharging criteria & follow-up arrangement
- 29 - Outcome of surgery/hospitalization
- 30
- 31

32 Module 5- Comfort & others

- 33 - Environmental conditions
- 34 - Sense of security
- 35 - Cost
- 36 - Administration & logistics
- 37
- 38
- 39
- 40
- 41
- 42
- 43
- 44
- 45
- 46
- 47
- 48
- 49
- 50
- 51
- 52
- 53
- 54
- 55
- 56
- 57
- 58
- 59
- 60



1  
2  
3 Additional file 2 Semi-structured interview guide at 30-day follow-up after discharge.

4 Warm up

- 5  
6 - Self introduction  
7 - Thank patient for participating and confirm consent verbally  
8 - Assess 30-day follow-up KPS  
9

10 General questions

- 11 - How did you feel about the recent hospital stay and the ERAS program?  
12 - What concerns you most about the ERAS program?  
13 - What do you recall in participating the ERAS program?  
14

15 Information transfer

- 16 - How did you feel about the education and counseling when you were enrolled for  
17 the ERAS program?  
18 - Do you recall any differences between the written information and verbal  
19 information?  
20 - Did the doctors' and nurses' respond to your questions and concerns adequately?  
21  
22

23 Symptom management & accelerated recovery

- 24 - What were your expectations about pain/fatigue/nausea and vomiting after  
25 surgery?  
26 - Was symptom control better/worse than you expected?  
27 - How was your recovery process after surgery? Was it faster/slower than you  
28 expected? Was it harder/easier than you expected?  
29  
30

31 Discharge & follow-up

- 32 - How did you feel about the time and condition at discharge? Did you feel ready to  
33 be discharged? Did you have any concern about early discharge?  
34 - Did you have any discomfort or problem after discharge? Did you get any  
35 help/guidance from the primary doctors?  
36 - How was your family support after discharge?  
37  
38

39 Cool down

- 40 - Encourage patient to talk about their experience/concerns/suggestions not  
41 mentioned in the previous questions  
42  
43  
44  
45  
46  
47  
48  
49  
50  
51  
52  
53  
54  
55  
56  
57  
58  
59  
60

# BMJ Open

**Neurosurgical enhanced recovery after surgery (ERAS)  
program for elective craniotomies: are patients satisfied  
with their experiences?  
A quantitative and qualitative analysis**

|                               |                                                                                                                                                                                                                                                                                                                                                                                                                                                                                                                                                                                                                                                                                                                                                                                                                                                                                                                                                                                                                                                                                                                                                                                                                                                                                                                                                                                                                                                                                                                                                                                                                                                                                                                                                                                                                                                                                                       |
|-------------------------------|-------------------------------------------------------------------------------------------------------------------------------------------------------------------------------------------------------------------------------------------------------------------------------------------------------------------------------------------------------------------------------------------------------------------------------------------------------------------------------------------------------------------------------------------------------------------------------------------------------------------------------------------------------------------------------------------------------------------------------------------------------------------------------------------------------------------------------------------------------------------------------------------------------------------------------------------------------------------------------------------------------------------------------------------------------------------------------------------------------------------------------------------------------------------------------------------------------------------------------------------------------------------------------------------------------------------------------------------------------------------------------------------------------------------------------------------------------------------------------------------------------------------------------------------------------------------------------------------------------------------------------------------------------------------------------------------------------------------------------------------------------------------------------------------------------------------------------------------------------------------------------------------------------|
| Journal:                      | <i>BMJ Open</i>                                                                                                                                                                                                                                                                                                                                                                                                                                                                                                                                                                                                                                                                                                                                                                                                                                                                                                                                                                                                                                                                                                                                                                                                                                                                                                                                                                                                                                                                                                                                                                                                                                                                                                                                                                                                                                                                                       |
| Manuscript ID                 | bmjopen-2018-028706.R1                                                                                                                                                                                                                                                                                                                                                                                                                                                                                                                                                                                                                                                                                                                                                                                                                                                                                                                                                                                                                                                                                                                                                                                                                                                                                                                                                                                                                                                                                                                                                                                                                                                                                                                                                                                                                                                                                |
| Article Type:                 | Original research                                                                                                                                                                                                                                                                                                                                                                                                                                                                                                                                                                                                                                                                                                                                                                                                                                                                                                                                                                                                                                                                                                                                                                                                                                                                                                                                                                                                                                                                                                                                                                                                                                                                                                                                                                                                                                                                                     |
| Date Submitted by the Author: | 02-May-2019                                                                                                                                                                                                                                                                                                                                                                                                                                                                                                                                                                                                                                                                                                                                                                                                                                                                                                                                                                                                                                                                                                                                                                                                                                                                                                                                                                                                                                                                                                                                                                                                                                                                                                                                                                                                                                                                                           |
| Complete List of Authors:     | <p>Liu, Bolin; Xi'an International Medical Center, Department of Neurosurgery; Tangdu Hospital Fourth Military Medical University, Department of Neurosurgery</p> <p>Liu, Shujuan; Fourth Military Medical University, Department of Obstetrics and Gynecology</p> <p>Wang, Yuan; Tangdu Hospital Fourth Military Medical University, Department of Neurosurgery</p> <p>Zhao, Binfang; Tangdu Hospital Fourth Military Medical University, Department of Neurosurgery</p> <p>Zhao, Tianzhi; Tangdu Hospital Fourth Military Medical University, Department of Neurosurgery</p> <p>Zhao, Lanfu; Tangdu Hospital Fourth Military Medical University, Department of Neurosurgery</p> <p>Lv, Wenhai; Tangdu Hospital Fourth Military Medical University, Department of Neurosurgery</p> <p>Zhang, Yufu; Tangdu Hospital Fourth Military Medical University, Department of Neurosurgery</p> <p>Zheng, Tao; Xi'an International Medical Center, Department of Neurosurgery; Tangdu Hospital Fourth Military Medical University, Department of Neurosurgery</p> <p>Xue, Yafei; Tangdu Hospital Fourth Military Medical University, Department of Neurosurgery</p> <p>Chen, Lei; Xi'an International Medical Center, Department of Neurosurgery; Tangdu Hospital Fourth Military Medical University, Department of Neurosurgery</p> <p>Chen, Long; Tangdu Hospital Fourth Military Medical University, Department of Neurosurgery</p> <p>Wu, Yingxi; Tangdu Hospital Fourth Military Medical University, Department of Neurosurgery</p> <p>gao, guodong; Tangdu Hospital Fourth Military Medical University, Department of Neurosurgery</p> <p>Qu, Yan; Tangdu Hospital Fourth Military Medical University, Department of Neurosurgery</p> <p>He, Shiming; Xi'an International Medical Center, Department of Neurosurgery; Tangdu Hospital Fourth Military Medical University, Department of Neurosurgery</p> |
| <b>Primary Subject            | Health services research                                                                                                                                                                                                                                                                                                                                                                                                                                                                                                                                                                                                                                                                                                                                                                                                                                                                                                                                                                                                                                                                                                                                                                                                                                                                                                                                                                                                                                                                                                                                                                                                                                                                                                                                                                                                                                                                              |

1  
2  
3  
4  
5  
6  
7  
8  
9  
10  
11  
12  
13  
14  
15  
16  
17  
18  
19  
20  
21  
22  
23  
24  
25  
26  
27  
28  
29  
30  
31  
32  
33  
34  
35  
36  
37  
38  
39  
40  
41  
42  
43  
44  
45  
46  
47  
48  
49  
50  
51  
52  
53  
54  
55  
56  
57  
58  
59  
60

|                            |                                                                                                                                            |
|----------------------------|--------------------------------------------------------------------------------------------------------------------------------------------|
| Heading                    |                                                                                                                                            |
| Secondary Subject Heading: | Patient-centred medicine, Qualitative research, Surgery                                                                                    |
| Keywords:                  | Quality in health care < HEALTH SERVICES ADMINISTRATION & MANAGEMENT, NEUROSURGERY, Neurological oncology < ONCOLOGY, QUALITATIVE RESEARCH |
|                            |                                                                                                                                            |

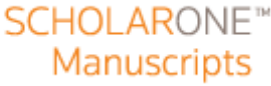

1  
2  
3  
4 **Neurosurgical enhanced recovery after surgery (ERAS) program for elective**  
5 **craniotomies: are patients satisfied with their experiences?**  
6

7 **A quantitative and qualitative analysis**  
8  
9

10  
11  
12 Bolin Liu<sup>1,2\*</sup>, M.D., Ph.D., Shujuan Liu<sup>3\*</sup>, M.D., Ph.D., Yuan Wang<sup>2\*</sup>, M.D., Ph.D.,  
13  
14 Binfang Zhao<sup>2</sup>, B.S.N., Tianzhi Zhao<sup>2</sup>, M.D., Ph.D., Lanfu Zhao<sup>2</sup>, M.D., Wenhai Lv<sup>2</sup>,  
15  
16 M.D., Yufu Zhang<sup>2</sup>, M.D., Tao Zheng<sup>1,2</sup>, M.D., Yafei Xue<sup>2</sup>, M.D., Lei Chen<sup>1,2</sup>, M.D.,  
17  
18 Long Chen<sup>2</sup>, M.D., Yingxi Wu<sup>2</sup>, M.D., Guodong Gao<sup>2</sup>, M.D., Ph.D., Yan Qu<sup>2</sup>, M.D.,  
19  
20 Ph.D., Shiming He<sup>1,2†</sup>, M.D., Ph.D..  
21  
22  
23  
24  
25  
26  
27

28 <sup>1</sup>Department of Neurosurgery, Xi'an International Medical Center, Xi'an, Shaanxi  
29  
30 Province, China.  
31

32  
33 <sup>2</sup>Department of Neurosurgery, Tangdu Hospital, Fourth Military Medical University,  
34  
35 Xi'an, Shaanxi Province, China.  
36

37  
38 <sup>3</sup>Department of Obstetrics and Gynecology, Xijing Hospital, Fourth Military Medical  
39  
40 University, Xi'an, Shaanxi Province, China.  
41  
42  
43  
44  
45

46 \*These authors contributed equally to this work.  
47  
48  
49  
50

51 <sup>†</sup>Correspondence to: Shiming He, Department of Neurosurgery, Xi'an International  
52  
53 Medical Center, No.1 Xitai Road, Xi'an, Shaanxi Province, 710100, China. Tel & Fax  
54  
55 +86-29-68301912; Email:he-shiming@163.com, neurosurg@126.com  
56  
57  
58  
59  
60

1  
2  
3  
4 **Key words:** Patient satisfaction, patient experience, enhanced recovery after surgery,  
5 fast-track surgery, neurosurgery, health care quality  
6  
7

8  
9 **Running title:** Patient experience in enhanced recovery after surgery program  
10  
11

12  
13  
14 **Patient consent for publication:** Obtained.  
15

#### 16 **Author Contributions**

17  
18 Conception and design: B Liu, S Liu, Y Wang, T Zhao, S He. Acquisition of data: B  
19 Liu, S Liu, Y Wang, B Zhao, L Zhao, W Lv, Y Zhang, T Zheng, Y Xue, L Chen, L  
20 Chen, Y Wu, S He. Analysis and interpretation of data: B Liu, S Liu, Y Wang, B  
21 Zhao, S He. Drafting the article: B Liu, S Liu, Y Wang, S He. Critically revising the  
22 article: B Liu, S Liu, Y Wang, T Zhao, L Zhao, W Lv, Y Zhang, T Zheng, Y Xue, L  
23 Chen, L Chen, Y Wu, G Gao, Y Qu, S He. Reviewed submitted version of  
24 manuscript: all. Approved the final version of the manuscript: all. Statistical analysis:  
25 B Liu, S Liu, Y Wang. Administrative/technical/material support: B Zhao, L Zhao, W  
26 Lv, Y Zhang, T Zheng, Y Xue, L Chen, L Chen, Y Wu, G Gao, Y Qu, S He. Study  
27 supervision: G Gao, Y Qu, S He.  
28  
29  
30  
31  
32  
33  
34  
35  
36  
37  
38  
39  
40  
41  
42  
43  
44

45 **Funding:** This work was supported by China Natural Science Foundation (81572470  
46 and 81802486).  
47  
48

49 **Conflict of interest:** None.  
50

51  
52 **Ethics approval:** Tangdu Hospital Ethics Board of Fourth Military Medical  
53 University.  
54  
55

56 **Data sharing statement:** Data available on request.  
57  
58  
59  
60

## Abstract

**Objectives.** To evaluate the patient satisfaction and associated predictors at discharge as well as patient experience at 30-day follow-up in a neurosurgical enhanced recovery after surgery (ERAS) program.

**Design.** A single-center prospective randomized controlled study.

**Setting.** A tertiary hospital in China.

**Participants.** A total of 140 neurosurgical patients admitted for elective craniotomy between October 2016 and July 2017 were included if they aged 18-65 years-old and had a single intracranial lesion.

**Interventions.** Patients were randomized into 2 groups: 70 patients received care according to a novel neurosurgical ERAS protocol (ERAS group), and 70 patients received conventional perioperative care (control group).

**Outcome measures.** Patient satisfaction at discharge was evaluated using a multi-modal questionnaire. A secondary analysis of patient experience in participating the ERAS program was conducted by a semi-structured qualitative interview via telephone at 30-day follow-up.

**Results.** Mean patient satisfaction was significantly higher in ERAS group than control group at discharge ( $92.2 \pm 4.3$  vs.  $86.8 \pm 7.4$ ,  $P = 0.0001$ ). The most important predictors of patient satisfaction included age [odds ratio (OR) = 6.934], postoperative nausea and vomiting (PONV) visual analog scale (VAS) (OR = 0.184), absorbable skin suture (OR = 0.007), and postoperative length of stay (LOS) (OR = 0.765).

Analysis on patients experience revealed 5 themes: information transfer, professional support, shared responsibility and active participation, readiness for discharge, and follow-up, all of which are closely related and represent positive and negative aspects.

**Conclusions.** Measures including decreasing PONV VAS, incorporating absorbable skin suture, and shortening LOS seem to increase patient satisfaction in a neurosurgical ERAS program. Analysis of patient experience data highlights several aspects to achieve patient-centered and high-quality care. Further studies are warranted to standardize the assessment of patient satisfaction and experience in

1  
2  
3  
4 planning, employing and appraising ERAS programs.  
5

6 Trial registration. Chinese Clinical Trial Registry  
7  
8 (<http://www.chictr.org.cn/showproj.aspx?proj=16480>), ChiCTR-INR-16009662.  
9  
10

### 11 12 13 **Strengths and limitations of this study** 14

- 15 • A randomized controlled trial to evaluate patient satisfaction.
- 16 • Incorporate both quantitative and qualitative analysis.
- 17 • Qualitative analysis done solely for ERAS patients without controls.  
18  
19  
20  
21  
22

### 23 **Introduction** 24

25 Enhanced recovery after surgery (ERAS) or fast-track surgery program, which was  
26 firstly proposed and applied by Kehlet in 1997, has been proven to benefit the patients  
27 with shortened hospital length of stay (LOS), improved functional recovery,  
28 decreased morbidity and health care costs in several surgical fields including  
29 colorectal surgery, urological surgery, orthopedic surgery, cardiac surgery and  
30 gynecological surgery.<sup>1-3</sup> Recently, our group had proposed the first neurosurgical  
31 ERAS protocol for patients undergoing elective craniotomy and had completed the  
32 first randomized controlled trial to evaluate its efficacy and safety.<sup>4</sup> Similar to  
33 previous studies, our ERAS program is a multidisciplinary, evidence-based protocol  
34 consisting of preoperative, intraoperative, and postoperative interventions as well as a  
35 discharge plan. Our results confirmed that implementation of the ERAS program was  
36 associated with significant reduction in postoperative LOS and acceleration of  
37 functional recovery, without increasing the complication or readmission/reoperation  
38 rates compared to conventional neurosurgical perioperative care.<sup>4</sup>  
39  
40  
41  
42  
43  
44  
45  
46  
47  
48  
49  
50  
51

52 Despite these known objective benefits of ERAS programs that have been proven  
53 repeatedly, very few studies had emphasized the importance of patient satisfaction  
54 and experience in participating in such programs.<sup>3 5 6</sup> However, there is now a drive to  
55 apprehend the patients' perspective in evaluating quality of health care, which is  
56 considered to have equal importance as clinical effectiveness and patients' safety.<sup>3</sup>  
57  
58  
59  
60

1  
2  
3  
4 Because of the paucity of studies on patient satisfaction and experience associated  
5 with the participation in an ERAS program, we have assessed the patient satisfaction  
6 at discharge and analyzed the predictive factors of patient satisfaction in elective  
7 craniotomy patients who had enrolled in a neurosurgical ERAS program in a  
8 prospective randomized controlled study.  
9  
10  
11  
12

13 In addition, since patients' perception of comfort is as critical as objective goals of  
14 recovery in judging the effectiveness of medical care delivery, we have further  
15 incorporated a secondary analysis of patient experience in participating the ERAS  
16 program by a semi-structured qualitative interview via telephone at 30-day follow-up  
17 after discharge.  
18  
19  
20  
21  
22  
23  
24

## 25 **Methods**

### 26 *Patient Population*

27  
28 Patients admitted for elective craniotomy at the Department of Neurosurgery of  
29 Tangdu Hospital (Xi'an, People's Republic of China) between October 2016 and July  
30 2017 were included in the study of the neurosurgical ERAS program.<sup>4</sup> A total of 140  
31 patients, aged 18 to 65 years-old, who had a single intracranial lesion and medically  
32 eligible for elective craniotomy were enrolled and randomly allocated to two groups.  
33  
34 The ERAS group received care according to a novel neurosurgical ERAS protocol,  
35 which consists of patient evaluation, patient and family counseling, functional status  
36 evaluation, nutritional assessment, smoking and alcohol abstinence, antithrombotic  
37 prophylaxis, preoperative intestinal intervention, preoperative oral carbohydrate  
38 loading, microinvasive surgery, scalp incision anesthesia, nonopioid analgesia,  
39 absorbable skin suture, hypothermia avoidance, goal-directed fluid balance,  
40 postoperative management of pain and postoperative nausea and vomiting (PONV),  
41 early oral nutrition resumption, early ambulation, and so on. The control group  
42 received conventional perioperative care according to institutional practice patterns.<sup>4</sup>  
43  
44  
45  
46  
47  
48  
49  
50  
51  
52  
53  
54  
55

### 56 *Assessment and Data Collection*

57  
58 Demographic variables including age, sex, height, weight, body mass index (BMI),  
59 educational level, occupational status, marital status, primary diagnosis of intracranial  
60



1  
2  
3  
4 diseases, American Society of Anesthesiology (ASA) grades and patient  
5 comorbidities (smoking, diabetes, hypertension, hypercholesterolemia, etc.) were  
6 recorded. Surgery-related variables including length of surgery/anesthesia, blood loss,  
7 blood transfusion, and fluid balance were documented as well. Variables associated  
8 with accelerated recovery regimen included PONV visual analogue scales VAS,  
9 preoperative carbohydrate loading, absorbable skin suture, mechanical prophylaxis  
10 for DVT, early removal of urinary catheter (within 6 h), oral solid intake on  
11 postoperative day (POD) 1, mobilization on POD 1, postoperative wound drainage,  
12 and pain management. Clinical outcome variables compromised postoperative LOS,  
13 total hospital LOS, readmission, reoperation, postoperative surgical and non-surgical  
14 complications, functional recovery (i.e. KPS) at discharge and 30-day follow-up.

15  
16  
17  
18  
19  
20  
21  
22  
23  
24  
25 A modified edition of a validated patient satisfaction questionnaire consisting of 5  
26 modules with 20 questions was applied to assess patient satisfaction at discharge.<sup>7</sup> A  
27 cross-sectional pilot study was done to validate the instrument, which showed  
28 acceptable internal reliability consistency (Cronbach's alpha exceeded 0.70 for all  
29 modules) and test-retest reliability (Weighted Kappa indexes ranged from 0.92 to 0.96,  
30 Inter-correlation coefficient ranged from 0.70 to 0.92). The modules incorporated  
31 information, medical care, nursing care, enhanced recovery, comfort & others, each of  
32 which consists of 4 questions (Additional file 1). Each question was answered using a  
33 1-5 point numerical scale, with higher points indicating higher levels of patient  
34 satisfaction: 1 = completely dissatisfied; 2 = moderately dissatisfied, 3= neutral, 4=  
35 moderately satisfied, 5= completely satisfied. A scoring scale between 0 and 100 was  
36 thus derived from the sum of scores for the individual questions, with 100 indicating  
37 the highest level of satisfaction. Educational level, professional status, and marital  
38 status were also recorded. An interviewer who was a rotated surgical resident that has  
39 not involved in the patient care and blinded to the patient allocation was appointed to  
40 fill in all questionnaires.

41  
42  
43  
44  
45  
46  
47  
48  
49  
50  
51  
52  
53  
54  
55  
56  
57  
58  
59  
60  
The secondary assessment at 30-day follow-up after discharge was done via telephone  
interview. Only patients enrolled in the ERAS program were included in this part of  
study. Upon discharge an informed consent was obtained from each patient who

1  
2  
3  
4 wanted to participate. Maximum variation sampling was applied to form a purposive  
5 sample of 46 participants. In order to obtain and analyze patient experience in  
6 participating the ERAS program, an interpretative phenomenological approach was  
7 used.<sup>8</sup> Interviews were conducted by doctors from the Department of Neurosurgery  
8 (BL, YW, YZ, TZ, YX, LC, YW) employing a rule of not interviewing his/her own  
9 patients during hospital care. Participants were approached via telephone at home,  
10 with some having their family members present during the interview. A  
11 semi-structured interview guide consisting of 6 domains (Additional file 2) was  
12 designed to start with a warm-up to greet the patients and assess the 30-day follow-up  
13 KPS. Open, broad questions were asked first to encourage the patients to describe  
14 their general feelings and experiences about the ERAS program. A series of questions  
15 addressing specific domains including information transfer, symptom management &  
16 accelerated recovery, and discharge & follow-up were then asked to determine  
17 possible problems and concerns. Finally, cool-down questions were asked to allow  
18 patients to add information that has not been discussed. All interviews were  
19 audio-recorded and professionally transcribed verbatim immediately after the  
20 interview for analysis. No patient refused to participate or dropped out. The  
21 recruitment of additional patients stopped when data analysis would not be changed  
22 with more interviews, which is a convention of qualitative studies.

### 23 ***Compliance With Ethical Standards***

24 Local institutional review board (IRB) approval was obtained to perform this study  
25 and to use archived material for research purposes. The trial was prospectively  
26 registered at the Chinese clinical trial registry  
27 (<http://www.chictr.org.cn/showproj.aspx?proj=16480>) with registration number  
28 ChiCTR-INR-16009662 on 27 October 2016. The first patient was enrolled on 30  
29 October 2016. The protocol adheres to the principles set forth in the US Code of  
30 Federal Regulations, Title 45, Part 46, Protection of Human Subjects, revised June 23,  
31 2005, and the World Medical Association Declaration of Helsinki.

32 Patient satisfaction at discharge was one of the secondary endpoints included in the  
33 original study protocol approved by the IRB.<sup>4</sup> For the purpose of constant quality  
34  
35  
36  
37  
38  
39  
40  
41  
42  
43  
44  
45  
46  
47  
48  
49  
50  
51  
52  
53  
54  
55  
56  
57  
58  
59  
60

1  
2  
3  
4 improvement, the ERAS protocol has been continually applied and refined based on  
5  
6 feedbacks from the patients and providers as well as updates in the related fields.  
7  
8 Qualitative interview on patient experience at 30-day follow-up was additionally  
9  
10 included in the study and was further approved by the IRB.

### 11 ***Statistical Analysis***

12  
13 To test whether variables differed across groups, the chi-square test or Fisher exact  
14  
15 test was used according to the testing condition. Comparisons between continuous  
16  
17 data were done using ANOVA (with Scheffe's method for multiple comparisons) or  
18  
19 Mann-Whitney U test (with Kruskal-Wallis test for multiple comparisons) according  
20  
21 to the testing condition. Multinomial logistic regression was used to identify possible  
22  
23 predictors of patient satisfaction. Statistical significance was defined as  $p < 0.05$ . All  
24  
25 of the tests were 2-sided. Statistical analysis was performed using SPSS software  
26  
27 (version 16.0, SPSS, Inc.).

28  
29 As part of a randomized controlled study evaluating the safety and efficacy of a  
30  
31 neurosurgical ERAS program, patient satisfaction at discharge was assessed as a  
32  
33 secondary outcome.<sup>4</sup> The sample size was powered to be 58 patients in each group  
34  
35 based on the hypothesis that the primary outcome (i.e. postoperative LOS) would be  
36  
37 reduced by 25% (from about 7 days to 5 days) with a power of 80% and a  
38  
39 significance of 5%. Assuming a maximal dropout rate of 20%, the final sample size  
40  
41 was determined as 70 patients per arm.<sup>4</sup>

42  
43 Qualitative data analysis of the secondary assessment at 30-day follow-up was done  
44  
45 using interpretative phenomenological analysis (IPA) as previously described by  
46  
47 Smith et al.<sup>8</sup> Briefly, each transcribed interview was read and coded by 3 researchers  
48  
49 independently (BL, SL, YW), and then discussed thoroughly by the research team to  
50  
51 identify prominent themes. The process of analysis was done in parallel with the  
52  
53 interview so that the developing themes could be tested with reference to new data.  
54  
55 Similar themes were then grouped and combined to obtain the final themes. Finally,  
56  
57 the themes were interpreted and explained to reveal general issues in common as well  
58  
59 as unique features of each individual regarding patients' experiences. A subgroup of  
60  
61 participants were approached later during their follow-up at the hospital outpatient

1  
2  
3  
4 clinic to provide feedback on the findings of the researchers.

### 5 ***Patient and public involvement***

6  
7 No patients or members of the public were involved in the development and design of  
8  
9 this study. Patients and the general public will be informed of the study results via  
10  
11 peer-reviewed journals.  
12  
13

### 14 15 **Results**

16  
17 A total of 140 patients enrolled in the study and were randomized into 2 groups: 70  
18  
19 patients were allocated to the ERAS group receiving care according to the  
20  
21 neurosurgical ERAS protocol, and 70 patients were allocated to the control group  
22  
23 receiving conventional perioperative care. Demographic and clinical features did not  
24  
25 significantly differ between the two groups (Table 1). Details of surgery, accelerated  
26  
27 recovery regimen, and clinical outcomes were outlined in our previous report.<sup>4</sup>  
28  
29 Briefly, there was no significant difference of surgery-related variables between the  
30  
31 groups whereas all accelerated recovery regimen-related variables differed  
32  
33 significantly between the groups, which were in accordance with the ERAS protocol  
34  
35 (Table 2). Additionally, a shorter postoperative LOS (-3d,  $P < 0.0001$ ) was observed  
36  
37 in the ERAS group, which was associated with absorbable skin suture, oral solid  
38  
39 intake on POD 1, and no postoperative wound drainage in multivariate regression  
40  
41 analysis. There was no perioperative mortality, nor 30-day reoperation/readmission in  
42  
43 either group. There was no difference of surgical and non-surgical complications rates  
44  
45 between the groups. Functional recovery in terms of KPS scores at both discharge and  
46  
47 30-day follow-up were similar in the ERAS vs. control group.<sup>4</sup>

### 48 ***Patient satisfaction at discharge***

49  
50 All patients completed the questionnaire of patient satisfaction at discharge. Mean  
51  
52 patient satisfaction in the ERAS group was significantly higher than that in the control  
53  
54 group at discharge ( $92.2 \pm 4.3$  vs.  $86.8 \pm 7.4$ ,  $P = 0.0001$ ). Detailed patient satisfaction  
55  
56 scores according to each module are shown in Table 3.

57  
58 A predefined cut-off value of 90 classified the patients into “highly satisfied group”  
59  
60 (patient satisfaction score  $\geq 90$ ) and “not highly satisfied group” (score  $< 90$ ). Six

1  
2  
3  
4 (8.6%) and 37 patients (52.9%) were not highly satisfied in the ERAS and control  
5 group, respectively, which were significantly different ( $P < 0.0001$ ).

6  
7 Univariate analysis including demographic, surgery-related, clinical, and ERAS  
8 regimen variables showed significant association between a higher overall patient  
9 satisfaction and the following parameters in the ERAS group: mild PONV VAS,  
10 absorbable skin suture, and mild pain VAS on POD1 (Supplemental Table 1). ASA  
11 grade I, absorbable skin suture, and shorter postoperative LOS (no more than 4 d)  
12 were related to higher satisfaction of medical care. Occupational status was correlated  
13 with nursing care, with the unemployed expressing higher satisfaction than those were  
14 employed and homemaker/student/retired. Mild pain VAS on POD1 also showed  
15 more satisfaction with nursing care. Four parameters consisting of PONV VAS,  
16 absorbable skin suture, mild pain VAS on POD1, and shorter postoperative LOS,  
17 were related to higher satisfaction with enhanced recovery. No variable was found to  
18 statistically correlated with satisfaction domains of information or comfort & others.  
19 Multivariate logistic regression including variables with  $P < 0.20$  in the univariate  
20 analysis was done to identify independent predictors of higher overall patient  
21 satisfaction. Only ASA grade ( $\beta$  coefficient, 3.6; OR, 36.7; 95% CI, 4.4-303.7;  
22  $P=0.001$ ) was found to influence patient satisfaction significantly.

23  
24 On the other side, univariate analysis for the control group revealed ASA grade I as  
25 the only parameter associated with a higher overall patient satisfaction (data not  
26 shown). Older age ( $\geq 50$ ) and lower educational level (with no education or primary  
27 education) had a positive correlation with higher satisfaction with information.  
28 Factors including ASA grade I and mild PONV VAS were significantly related to  
29 higher satisfaction of medical care. ASA grade I was also related to higher satisfaction  
30 with nursing care as well as comfort & others. The results of multivariate analysis  
31 showed that age ( $\beta$  coefficient, 3.5; OR, 34.4; 95% CI, 2.5-474.7;  $P=0.008$ ) and ASA  
32 grade ( $\beta$  coefficient, -3.5; OR, 0.03; 95% CI, 0.002-0.6;  $P=0.024$ ) were the  
33 independent predictors for overall patient satisfaction.

34  
35 When combining the two groups together, variables including mild PONV VAS,  
36 preoperative carbohydrate loading, absorbable skin suture, mechanical prophylaxis  
37  
38  
39  
40  
41  
42  
43  
44  
45  
46  
47  
48  
49  
50  
51  
52  
53  
54  
55  
56  
57  
58  
59  
60

1  
2  
3  
4 for DVT, early removal of urinary drainage (within 6 h), oral solid intake on POD1,  
5 ambulation on POD1, no postoperative wound drainage, mild pain VAS on POD1,  
6 and shorter postoperative LOS all positively influenced overall patient satisfaction in  
7 univariate analysis (data not shown). These factors were also correlated with better  
8 satisfaction with medical care, nursing care, and enhanced recovery in univariate  
9 analysis. Nevertheless, age ( $\beta$  coefficient, 1.9; OR, 6.9; 95% CI, 1.9-25.5;  $P=0.004$ ),  
10 PONV VAS ( $\beta$  coefficient, -1.7; OR, 0.2; 95% CI, 0.04-0.9;  $P=0.042$ ), absorbable  
11 skin suture ( $\beta$  coefficient, -5.0; OR, 0.007; 95% CI, 0.0002-0.3;  $P=0.009$ ), and  
12 postoperative LOS ( $\beta$  coefficient, -3.8; OR, 0.8; 95% CI, 0.2-0.9;  $P=0.020$ ) were  
13 retained as the independent factors affecting patient satisfaction when multivariate  
14 analysis was used.

### ***Patient experience at 30-day follow-up***

15  
16 A purposeful sample of 46 patients participated in the semi-structured interviews at  
17 30-day follow-up after discharge. A total of 19 men and 27 women aged 18-65 years  
18 were interviewed. The duration of interviews ranged 15-30 minutes. Of the 46  
19 interviews, two were excluded from analysis because of poor quality of material.  
20 Patients' experiences in participating a neurosurgical ERAS program were organized  
21 into 5 final themes: information transfer, professional support, shared responsibility  
22 and active participation, readiness for discharge, and follow-up.

#### ***Information transfer***

23  
24 Most patients felt that they were well educated and counseled when they were  
25 enrolled for the ERAS program. However, some reported that too much information  
26 was given at the same time so that they were unable to remember everything, nor  
27 were they able to think over to raise questions (Table 4- 1). Therefore, it is preferable  
28 that the written information was provided one week before surgery.

#### ***Professional support***

29  
30 Most patients reported that they acknowledged that it was natural to experience  
31 pain/fatigue/nausea associated with surgery and anesthesia, and they were prepared  
32 for that in some extent. When they were enrolled for the ERAS program, they  
33 expected that the program may help in alleviating these discomfort postoperatively.  
34  
35  
36  
37  
38  
39  
40  
41  
42  
43  
44  
45  
46  
47  
48  
49  
50  
51  
52  
53  
54  
55  
56  
57  
58  
59  
60

1  
2  
3  
4 Even though the results have proved that more patients in the ERAS group reported  
5 mild pain on POD1 and shortened duration of pain than those in the control group,<sup>4</sup> a  
6 few patients were dissatisfied with the management of postoperative pain. The  
7 different degrees of satisfaction with postoperative pain management could be  
8 explained by the subjectivity of pain and individualized experiences of receiving and  
9 tolerating analgesia. However the patients mentioned that they did feel better when  
10 the caregivers showed great empathy and responded to their complains promptly and  
11 actively (Table 4- 2.1). In contrast, they felt worse when some caregivers simply  
12 assured them that “it was not uncommon” (Table 4- 2.2). It is valuable for the  
13 caregivers to contribute to a positive feeling. Similar issue existed concerning PONV  
14 (Table 4- 2.3).

15  
16  
17  
18  
19  
20  
21  
22  
23  
24  
25 Some patients also reported that the amount of attention they received declined  
26 significantly after the first couple of PODs. They felt that some caregivers did not  
27 behave patiently enough in listening and responding to their questions and concerns  
28 when they have undergone the most intense period postoperatively and seemed  
29 “stable” compared to other patients (Table 4- 2.4,2.5).

#### 30 31 32 33 34 35 *Shared responsibility and active participation*

36  
37 Though all the patients were excited when they were educated preoperatively that  
38 they would be able to drink/eat and ambulate sooner than they expected after surgery,  
39 some showed a concern of “being obliged to do so” (Table 4- 3.1). Some felt that the  
40 process of accelerated recovery was designed by the caregivers and they were  
41 passively striving hard to meet the individual goals preset by the protocol which  
42 sometimes ended up with unpleasant experiences (Table 4- 3.2).

43  
44  
45  
46  
47  
48 In addition, some patients mentioned that they dislike the feeling of being told to  
49 follow the “rigid” instructions in their recovery process, instead it would be better if  
50 they could play a more active role in setting their own targets from day to day after  
51 surgery (Table 4- 3.3).

#### 52 53 54 55 56 *Readiness for discharge*

57  
58 Many patients expressed their excitement with early discharge, which was also  
59 associated with reduced total cost of hospitalization<sup>4</sup> and faster return to normal life  
60

1  
2  
3  
4 and work. However a few felt that they were not ready to be discharged because a)  
5 they were still having mild symptoms (Table 4- 4.1, 4.2); b) they worried that their  
6 caretakers might not be able to take care of them at home as good as the caregivers  
7 did at the hospital (Table 4- 4.3); c) they felt that it would safer for them to stay in the  
8 hospital for a prolonged period of time if any late onset postoperative complications  
9 may occur (Table 4- 4.4, 4.5).

#### 15 *Follow-up*

16  
17 All patients praised for the convenience in contacting their primary doctors and  
18 relatively prompt response to their questions post discharge in the current study  
19 (Table 4- 5). We have been using social media cellphone/website app to contact  
20 patient, answer questions, identify possible complications, provide guidance, arrange  
21 follow-up visits, and offer support to patients in a timely fashion. This doubtlessly  
22 helps patients to alleviate their worry about “being untended” and increase their sense  
23 of security upon early discharge.  
24  
25  
26  
27  
28  
29  
30  
31  
32

#### 33 **Discussion**

34  
35 In order to improve health care quality, thorough study of the target population is  
36 doubtlessly of great significance to meet the requirements and expectations of  
37 individual patients. Patient-oriented outcome measures including functional recovery  
38 (e.g. KPS) and patient satisfaction are employed for quality evaluation. We have  
39 validated the benefits of a neurosurgical ERAS program in shortening LOS of patients  
40 undergoing craniotomy without increasing complication rates.<sup>4</sup> The current study  
41 further proved that patients in the ERAS group had higher overall satisfaction as well  
42 as higher satisfaction with individual domains including information, medical care,  
43 nursing care, and enhanced recovery. Thus, it is possible to provide the patients with  
44 satisfactory information, care and treatment during a shortened hospital stay. This  
45 highly satisfaction perceived by the patients, which represents patient-based assurance  
46 of quality, should be considered as one of the most important end points for any study  
47 evaluating the quality of hospital stay associated with the interventions (such as an  
48 ERAS program).  
49  
50  
51  
52  
53  
54  
55  
56  
57  
58  
59  
60



1  
2  
3  
4 Multivariate analysis revealed that higher ASA grade was the only independent  
5 predictor of a higher patient satisfaction in the ERAS group, whereas older age and  
6 lower ASA grade were independent predictors in the control group. These predictors  
7 can be interpreted as determinants of patient satisfaction in each group under  
8 circumstances in which most other factors do not vary significantly within each  
9 group. It is also understandable that mild PONV VAS, absorbable skin suture, and  
10 shorter postoperative LOS, which are among the key distinguishing factors between  
11 the two groups, were independent predictors for patient satisfaction in all patients.  
12 Age was also a predictor for patient satisfaction in all patients, which is in accordance  
13 with previous studies showing that older patients tend to have higher satisfaction  
14 scores with hospital health care.<sup>9-11</sup>

15  
16 Intriguingly, ASA grade was shown to be a significant predictor of patient satisfaction  
17 in the ERAS and control group respectively with opposite direction of association; the  
18 lower ASA grade, the higher patient satisfaction in control group, whereas the higher  
19 ASA grade, the higher patient satisfaction in the ERAS group. In general, patient  
20 satisfaction appears to be higher in patients with better self-reported health status as  
21 shown in prior studies,<sup>10 11</sup> which is in accordance with the findings in the control  
22 group. On the other side, the benefits of the ERAS protocol may account for better  
23 satisfaction in patients with higher ASA grade. Satisfaction is a balance between  
24 patients' expectations for care and occurrence of care which is actually delivered,<sup>12</sup>  
25 and thus reflects changes in health status due to the effectiveness of hospital care. It is  
26 possible that for patients with higher ASA grade the ERAS-related interventions have  
27 made more profound change in self-perceived health status compared to those with  
28 lower ASA grade.

29  
30 Postoperative LOS was established as an independent predictor for patient satisfaction  
31 in all patients in the current study. In addition, it was also related to specific  
32 satisfaction domains such as medical care and enhanced recovery in the ERAS group  
33 as well as in all patients. The shorter the LOS, the higher the satisfaction, which  
34 seems rational and has been shown in other studies as well.<sup>9 11 13</sup>

35  
36 Bias associated with questionnaire surveys of satisfaction has been recognized as

1  
2  
3  
4 patients tend to overly positively score the care they received.<sup>14</sup> Furthermore,  
5 patients' explicitly positive attitude toward accelerated discharge actually masks their  
6 concerns and complaints.<sup>15</sup> Therefore patient experience data may provide with more  
7 information in assessing the quality of care to identify the circumstances surrounded  
8 the key ERAS components which make the patients satisfactory (or not) as well as the  
9 associated reasons.<sup>16</sup>

10  
11  
12  
13  
14  
15 In the absence of previous relevant study on patient experience in participating a  
16 neurosurgical ERAS program, we have conducted a secondary analysis of patient  
17 experience at 30-day follow-up after discharge. Based on our results, the 5 different  
18 themes were closely related to each other and represent both positive and negative  
19 sides. They showed shortcomings of care which warrant improvement in future as  
20 well as strong points which may be considered for generalization.

21  
22  
23  
24  
25  
26  
27 There is no doubt that information transfer the first and foremost step of incorporating  
28 patients into an ERAS program. It calls to attention the importance of having the  
29 ERAS conversation at least one week before surgery to allow the patients to have  
30 enough time to understand the process and raise questions. It was shown that  
31 receiving information at appropriate times improved patient satisfaction with their  
32 discharge planning.<sup>17 18</sup> This is practical for elective surgeries and should be adopted  
33 in future practices.

34  
35  
36  
37  
38  
39  
40 It is notable that emotional support from healthcare professionals is as crucial as  
41 medical interventions in symptom management. When facing dilemmas of  
42 burdensome symptoms and expectations for rapid recovery, the patients need to  
43 mobilize courage and will to follow the ERAS regimen. Though interventions  
44 associated with ERAS protocol have been proved to improve management of  
45 postoperative pain and PONV significantly,<sup>4</sup> it is perceived by patients from both  
46 previous studies<sup>17 19</sup> and ours that professional's empathy and supportive behavior  
47 function as decisive factors in accomplishing objectives of the ERAS program. In  
48 addition, as healthcare professionals are often enthusiastic in counseling the patients  
49 in the beginning of the study, it is important for them to being responsive to patients'  
50 need throughout the hospital stay.  
51  
52  
53  
54  
55  
56  
57  
58  
59  
60

1  
2  
3  
4 It was overlooked in the practice of current study that the patients need to take  
5 responsibilities for their own to achieve an accelerated recovery and good result. They  
6 should be encouraged to act more actively and set their own daily goals after surgery.  
7  
8 In addition to the shared responsibility and active participation required for the  
9 patients,<sup>1 19</sup> they also possess the right to adjust their goals based on their  
10 individualized conditions. The supportive role of caregivers should preferably be  
11 more like an assistant than a leader to hasten recovery.  
12  
13  
14  
15  
16

17 It remains a hot and tough issue of patients expressing insecurities about early  
18 discharge in several studies on patient experience of ERAS programs. The most  
19 common concerns were associated with pain management, mobilization, identifying  
20 postoperative complications and lack of family support.<sup>5 15 19 20</sup> Our patients  
21 mentioned all these concerns as well. However, our strategy of follow-up with social  
22 media cellphone/website app in a timely and responsive manner has proved to be  
23 effective in enhancing patients' sense of security and improving their experience after  
24 discharge. It is less manpower-relied compared to follow-up visits in person or via  
25 phone calls, and benefits the patients significantly. The patients felt that the healthcare  
26 providers were still reachable and responsive through the app after discharge. By  
27 using the app not only can the medical staffs track and collect follow-up data from the  
28 patients, but also can they answer patients' questions, address concerns, guide  
29 rehabilitation, identify possible newly onset complications and schedule clinic visits.  
30 Therefore patients' traditional beliefs of "safer and necessary prolonged  
31 convalescence at hospital" would no longer be a barrier to early discharge in the  
32 ERAS program.  
33  
34  
35  
36  
37  
38  
39  
40  
41  
42  
43  
44  
45  
46  
47

48 One limitation of the current study is that the findings from a single institution with  
49 sampled participants can not be automatically generalized. For one thing, sampling  
50 bias may exist. For another, the possible relationship of patients' views and their  
51 personal/domestic characteristics were not well studied in the qualitative analysis.  
52 Another limitation is the lack of dedicated sample size calculation for outcomes  
53 measured in this study since patient satisfaction was a secondary outcome of the main  
54 trial.<sup>4</sup> Nevertheless, the risk of an underpowered sample size was to some extent  
55  
56  
57  
58  
59  
60

1  
2  
3  
4 counter-balanced by a post-hoc power analysis for patient satisfaction, which yielded  
5 a post-hoc power of 100%. Above all things, the views of patients in the control group  
6 who received conventional perioperative care were not taken into account in the  
7 qualitative analysis either. However, the quantitative analysis which showed higher  
8 patient satisfaction with the ERAS program goes some towards validating the  
9 qualitative findings.  
10  
11  
12  
13  
14

15 In addition to patient satisfaction, medical cost reduction should be highly valued as  
16 well given the increasing cost burden posed on both the patients and public finance.  
17 To this end, ERAS programs may play an important role in quality improvement with  
18 cost-effective care.  
19  
20  
21  
22  
23  
24

## 25 **Conclusions**

26 Patients in the ERAS group demonstrated higher satisfaction compare with the  
27 controls. Factors including age, PONV VAS, absorbable skin suture, and  
28 postoperative LOS were independent predictors for overall patient satisfaction.  
29 Patients value adequate and consistent information transfer as well as professional  
30 support in participating an ERAS program. It is also important to encourage the  
31 patients to take active roles and take responsibilities for their own in accelerating  
32 recovery. Timely and responsive follow-up modality after discharge could enhance  
33 patients' sense of security. The findings of the current study may serve as a stepping  
34 stone to promote further research into the evaluation and validation of patient  
35 satisfaction and experience in order to improve service delivery and patient care.  
36  
37  
38  
39  
40  
41  
42  
43  
44  
45  
46  
47

## 48 **References**

- 49  
50  
51 1. Kehlet H, Wilmore DW. Evidence-based surgical care and the evolution of  
52 fast-track surgery. *Annals of surgery* 2008;248(2):189-98. doi:  
53 10.1097/SLA.0b013e31817f2c1a  
54  
55 2. Ljungqvist O, Scott M, Fearon KC. Enhanced Recovery After Surgery: A Review.  
56 *JAMA surgery* 2017;152(3):292-98. doi: 10.1001/jamasurg.2016.4952  
57  
58 3. Jones EL, Wainwright TW, Foster JD, et al. A systematic review of patient  
59  
60

- 1  
2  
3  
4 reported outcomes and patient experience in enhanced recovery after  
5 orthopaedic surgery. *Annals of the Royal College of Surgeons of England*  
6 2014;96(2):89-94. doi: 10.1308/003588414X13824511649571  
7  
8  
9  
10 4. Wang Y, Liu B, Zhao T, et al. Safety and efficacy of a novel neurosurgical  
11 enhanced recovery after surgery protocol for elective craniotomy: a  
12 prospective randomized controlled trial. *J Neurosurg* 2018:1-12. doi:  
13 10.3171/2018.1.JNS171552  
14  
15  
16  
17 5. Sibbern T, Bull Sellevold V, Steindal SA, et al. Patients' experiences of enhanced  
18 recovery after surgery: a systematic review of qualitative studies. *Journal of*  
19 *clinical nursing* 2017;26(9-10):1172-88. doi: 10.1111/jocn.13456  
20  
21  
22  
23 6. Husted H, Holm G, Jacobsen S. Predictors of length of stay and patient satisfaction  
24 after hip and knee replacement surgery: fast-track experience in 712 patients.  
25 *Acta orthopaedica* 2008;79(2):168-73. doi: 10.1080/17453670710014941  
26  
27  
28  
29 7. Wang Y, Yu Z, Jin X, et al. The development and assessment of reliability and  
30 validity of patient satisfaction questionnaire. *J Nurs Train* 2013;28(6):533-36.  
31  
32  
33 8. Smith JA, Flowers P, Larkin M. Interpretative phenomenological analysis: theory,  
34 method and research. . London: Sage 2009.  
35  
36  
37 9. Quintana JM, Gonzalez N, Bilbao A, et al. Predictors of patient satisfaction with  
38 hospital health care. *BMC health services research* 2006;6:102. doi:  
39 10.1186/1472-6963-6-102  
40  
41  
42  
43 10. Jaipaul CK, Rosenthal GE. Are older patients more satisfied with hospital care  
44 than younger patients? *Journal of general internal medicine* 2003;18(1):23-30.  
45  
46  
47 11. Nguyen Thi PL, Briancon S, Empereur F, et al. Factors determining inpatient  
48 satisfaction with care. *Social science & medicine* 2002;54(4):493-504.  
49  
50  
51 12. Linder-Pelz SU. Toward a theory of patient satisfaction. *Social science &*  
52 *medicine* 1982;16(5):577-82.  
53  
54  
55 13. Husted H, Hansen HC, Holm G, et al. What determines length of stay after total  
56 hip and knee arthroplasty? A nationwide study in Denmark. *Archives of*  
57 *orthopaedic and trauma surgery* 2010;130(2):263-8. doi:  
58 10.1007/s00402-009-0940-7  
59  
60

- 1  
2  
3  
4 14. Collins K, O'Cathain A. The continuum of patient satisfaction--from satisfied to  
5 very satisfied. *Social science & medicine* 2003;57(12):2465-70.  
6  
7  
8 15. Hunt GR, Hall GM, Murthy BV, et al. Early discharge following hip arthroplasty:  
9 patients' acceptance masks doubts and concerns. *Health expectations : an*  
10 *international journal of public participation in health care and health policy*  
11 2009;12(2):130-7. doi: 10.1111/j.1369-7625.2008.00522.x  
12  
13  
14  
15 16. Foot C, Fitzsimons B. The policy and practice of measuring patient experience.  
16  
17 *Nursing management* 2011;18(3):18-9. doi:  
18 10.7748/nm2011.06.18.3.18.c8535  
19  
20  
21 17. Aasa A, Hovback M, Bertero CM. The importance of preoperative information for  
22 patient participation in colorectal surgery care. *Journal of clinical nursing*  
23 2013;22(11-12):1604-12. doi: 10.1111/jocn.12110  
24  
25  
26  
27 18. Fielden JM, Scott S, Horne JG. An investigation of patient satisfaction following  
28 discharge after total hip replacement surgery. *Orthopedic nursing*  
29 2003;22(6):429-36.  
30  
31  
32  
33 19. Norlyk A, Harder I. After colonic surgery: The lived experience of participating in  
34 a fast-track programme. *International journal of qualitative studies on health*  
35 *and well-being* 2009;4:170-80. doi: 10.1080/17482620903027726  
36  
37  
38  
39 20. Vandrevala T, Senior V, Spring L, et al. 'Am I really ready to go home?': a  
40 qualitative study of patients' experience of early discharge following an  
41 enhanced recovery programme for liver resection surgery. *Supportive care in*  
42 *cancer : official journal of the Multinational Association of Supportive Care*  
43 *in Cancer* 2016;24(8):3447-54. doi: 10.1007/s00520-016-3158-6  
44  
45  
46  
47  
48  
49  
50  
51  
52  
53  
54  
55  
56  
57  
58  
59  
60

**Table 1. Sociodemographic and clinical features**

| Variable                     | ERAS group          | Control group | p Value |
|------------------------------|---------------------|---------------|---------|
|                              | No. of patients (%) |               |         |
| No. of patients              | 70                  | 70            |         |
| Age (years)                  |                     |               | 0.612   |
| <50                          | 33 (47.1)           | 36 (51.4)     |         |
| 50-65                        | 37 (52.9)           | 34 (48.6)     |         |
| Sex (Male/Female)            | 22/48               | 26/44         | 0.476   |
| BMI                          |                     |               | 0.617   |
| <18.5                        | 3 (4.3)             | 3 (4.3)       |         |
| 18.5 ~ 23.9                  | 47 (67.1)           | 52 (74.3)     |         |
| >24                          | 20 (28.6)           | 15 (21.4)     |         |
| Education                    |                     |               | 0.164   |
| No education                 | 4 (5.7)             | 0 (0)         |         |
| Primary school               | 8 (11.4)            | 5 (7.1)       |         |
| Secondary school/high school | 34 (48.6)           | 39 (55.7)     |         |
| College/more than college    | 24 (34.3)           | 26 (37.1)     |         |
| Occupation                   |                     |               | 0.352   |
| Employed                     | 29 (41.4)           | 31 (44.3)     |         |
| Homemaker                    | 18 (25.7)           | 14 (20.0)     |         |
| Unemployed                   | 12 (17.1)           | 19 (27.1)     |         |
| Student                      | 3 (4.3)             | 3 (4.3)       |         |
| Retired                      | 8 (11.4)            | 3 (4.3)       |         |
| Marital status               |                     |               | > 0.999 |
| Unmarried (Single/divorced)  | 5 (7.1)             | 5 (7.1)       |         |
| Married                      | 65 (92.9)           | 65 (92.9)     |         |
| ASA grades                   |                     |               | 0.410   |
| Grade I                      | 13 (18.6)           | 17 (24.3)     |         |
| Grade II                     | 57 (81.4)           | 53 (75.7)     |         |
| Intracranial lesions         |                     |               | 0.779   |
| Meningioma                   | 38 (54.3)           | 30 (42.9)     |         |
| Vestibular Schwannoma        | 7 (10.0)            | 9 (12.9)      |         |
| CPA epidermoid cyst          | 6 (8.6)             | 8 (11.4)      |         |
| Glioma                       | 13 (18.6)           | 18 (25.7)     |         |
| Trigeminal neuralgia         | 3 (4.3)             | 3 (4.3)       |         |
| Cavernous malformation       | 3 (4.3)             | 2 (2.9)       |         |

BMI = body mass index, ASA = American Society of Anesthesiologists', CPA = cerebellopontine angle

**Table 2. Variables associated with surgery and accelerated recovery regimen**

| Variable                              | ERAS group          | Control group | p Value |
|---------------------------------------|---------------------|---------------|---------|
|                                       | No. of patients (%) |               |         |
| No. of patients                       | 70                  | 70            |         |
| Length of procedure (hrs)             |                     |               | 0.180   |
| <3                                    | 15 (21.4)           | 22 (31.4)     |         |
| ≥3                                    | 55 (78.6)           | 48 (68.6)     |         |
| Blood loss during surgery (ml)        |                     |               | 0.310   |
| <300                                  | 30 (42.9)           | 36 (51.4)     |         |
| ≥300                                  | 40 (57.1)           | 34 (48.6)     |         |
| PONV VAS                              |                     |               | 0.115   |
| Mild (1-4)                            | 60 (85.7)           | 50 (71.4)     |         |
| Moderate (5-6)                        | 7 (10.0)            | 15 (21.4)     |         |
| Severe (7-10)                         | 3 (4.3)             | 5 (7.1)       |         |
| Preoperative carbohydrate loading     |                     |               | <0.0001 |
| Yes                                   | 64 (91.4)           | 0 (0)         |         |
| No                                    | 6 (8.6)             | 70 (100.0)    |         |
| Absorbable skin suture                |                     |               | <0.0001 |
| Yes                                   | 54 (77.1)           | 0 (0)         |         |
| No                                    | 16 (22.9)           | 70 (100.0)    |         |
| Mechanical prophylaxis for DVT        |                     |               | <0.0001 |
| Yes                                   | 45 (64.3)           | 11 (15.7)     |         |
| No                                    | 25 (35.7)           | 59 (84.3)     |         |
| Removal of urinary drainage (hrs)     |                     |               | <0.0001 |
| ≤6                                    | 52 (74.3)           | 0 (0)         |         |
| >6                                    | 18 (25.7)           | 70 (100.0)    |         |
| Time to first oral solid intake (hrs) |                     |               | <0.0001 |
| ≤24                                   | 38 (54.3)           | 12 (17.1)     |         |
| >24                                   | 32 (45.7)           | 58 (82.9)     |         |
| Ambulation on POD 1                   |                     |               | <0.0001 |
| Yes                                   | 45 (64.3)           | 0 (0)         |         |
| No                                    | 25 (35.7)           | 70 (100.0)    |         |
| Postoperative wound drainage          |                     |               | <0.0001 |
| No                                    | 58 (82.9)           | 2 (2.9)       |         |
| Yes                                   | 12 (17.1)           | 68 (97.1)     |         |
| Pain VAS on POD1                      |                     |               | <0.0001 |
| Mild (1-4)                            | 55 (78.6)           | 23 (32.9)     |         |
| Moderate (5-6)                        | 13 (18.6)           | 42 (60.0)     |         |
| Severe (7-10)                         | 2 (2.9)             | 5 (7.1)       |         |
| Postoperative LOS (d)                 |                     |               | <0.0001 |
| ≤4                                    | 32 (45.7)           | 7 (10.0)      |         |
| >4                                    | 38 (54.3)           | 63 (90.0)     |         |

DVT = deep vein thrombosis, LOS = length of stay, POD = postoperative day, PONV



= postoperative nausea and vomiting, VAS = visual analog scale

**Table 3. Patient satisfaction scores at discharge**

| Variable             | ERAS group      | Control group   | p Value  |
|----------------------|-----------------|-----------------|----------|
|                      | Median (range)  |                 |          |
| Overall Satisfaction | 92.2 (85 ~ 100) | 86.8 (50 ~ 100) | 0.0001   |
| Information          | 17.4 (15 ~ 20)  | 16.5 (12 ~ 20)  | 0.039    |
| Medical care         | 18.9 (15 ~ 20)  | 18.3 (15 ~ 20)  | 0.043    |
| Nursing care         | 19.2 (17 ~ 20)  | 18.6 (15 ~ 20)  | 0.032    |
| Enhanced recovery    | 18.5 (15 ~ 20)  | 15.7 (10 ~ 20)  | < 0.0001 |
| Comfort & others     | 18.2 (14 ~ 20)  | 17.9 (12 ~ 20)  | 0.317    |

For peer review only

**Table 4. Quotes from patients**

| Theme                   | Quotes                                                                                                                                                                                                                                                                                                                                                                                                                                                                                                                                                                                                                                                                                                                                                                                                                                                                                                                                                                                                                                                                                                                                                                                                                                                                                                                                                                                                                                                                                                                                                                                                                                                                                                                                                |
|-------------------------|-------------------------------------------------------------------------------------------------------------------------------------------------------------------------------------------------------------------------------------------------------------------------------------------------------------------------------------------------------------------------------------------------------------------------------------------------------------------------------------------------------------------------------------------------------------------------------------------------------------------------------------------------------------------------------------------------------------------------------------------------------------------------------------------------------------------------------------------------------------------------------------------------------------------------------------------------------------------------------------------------------------------------------------------------------------------------------------------------------------------------------------------------------------------------------------------------------------------------------------------------------------------------------------------------------------------------------------------------------------------------------------------------------------------------------------------------------------------------------------------------------------------------------------------------------------------------------------------------------------------------------------------------------------------------------------------------------------------------------------------------------|
| 1. Information transfer | <p>1.1 “Well you know it’s a good thing but there’s simply too much information out there. So I said to myself ok just let the doctors and nurses tell me what to do next. I’ll follow the instructions as long as I know they mean good.” (#6)</p> <p>1.2 “They spent quite some time to explain the document point by point. It sounds great. Everybody wants a better outcome. Then they asked me if I had any questions. Well I could not think of any right away. They said I would keep one copy of the documents and I’m welcomed to ask questions at any time. But later on the nurses came for the pre-op stuff, then the barber, then the anesthetist, and the OR nurses. I was preoccupied with the surgery I didn’t even give them a second look. It would be better if they gave me the documents some time earlier rather than only two days before surgery.” (#9)</p>                                                                                                                                                                                                                                                                                                                                                                                                                                                                                                                                                                                                                                                                                                                                                                                                                                                                  |
| 2. Professional support | <p>2.1 “They gave me a patient-controlled analgesia pump for the first couple of days after surgery and it really helped a lot. I didn’t feel much pain at that time. But things changed the third day when they switched the pump to oral painkillers. It seemed to me that the oral painkillers helped little. I didn’t expect that I’d suffered from surgical pain starting on POD3. Of course I asked for help. Then came this very patient and intellectual nurse. She spent some time to explain to my family and me about the necessity of switching the pump to oral pills. She also told us that the drug used in the pump was the similar type as the oral ones. She mentioned in the end that she could ask the doctors to refill my pump if I really need that. Then I thought well, if I want to go home early I can not rely on the pump. I didn’t refill the pump and the pain did subside as time went by. Also, she checked on me later that day before the shift of duty and the next morning the first thing she came to the ward. I was able to be discharged a couple of days later, going home with oral painkillers. I was very thankful to her.” (#29)</p> <p>2.2 “I knew it was natural to had pain because of the surgery but it was intense. I expected the doctor to do something but he just told me ‘It is not uncommon. If I were you I’d have the pain too.’ It was not helping.” (#26)</p> <p>2.3 “The smell of food made me really nausea and I didn't want to eat at all. I called the nurse and then she called in a doctor. He checked my order of drugs and said they already give me drugs for the nausea and it was natural because there’s certainly some swelling in my brain due to the surgery.” (#5)</p> |

3. Shared  
responsibility and  
active participation

2.4 “It felt like that they really wanted me to join the program and they really wanted to make sure that I met the milestones. Removal of urinary drain, oral liquid and then solid food intake, off-bed activity... I thought I did everything great. I was proud of myself and grateful to the healthcare team. But after that I felt like I was abandoned. They were probably busy helping others who were not doing great as I did...” (#40)

2.5 “In the beginning when the nurses had their shifts in front of my bed they would remind each other ‘this is an ERAS patient’ and I know it means something different. I can tell that they paid more attention to me than to other patients... Later on they were talking like ‘this is an ERAS patient and he already got off bed yesterday’ Then I became the one who doesn't deserve their attention.” (#13)

3.1 “You signed the consent and you made a commitment. You are obliged to stay strong and comply with the rules. It is a sort of pressure.” (#40)

3.2 “The second afternoon after I had my surgery the nurse came in to remind me that it was time for me to get off bed and try to walk according to the schedule. Yes I could fetch my meals and they had removed the drip. But I was not feeling well enough. I had some faintness. I asked ‘maybe we can try tomorrow morning?’ but she kept telling me that how other managed to walk on the second day after surgery and that ‘nobody was ready enough for that’. I didn’t want to annoy her so I tried. I could not recall what happened next because I passed out. She was scared of course. She came to apologize to me the next day. I don’t blame her personally but they should have a mechanism to adjust the goal and not to take them as fixed rules.” (#25)

3.3 “A nurse came in and she shouted ‘how come you’re still in bed? You don’t have any IV fluids today and now try to walk’. But I already walked and I even walked two rounds in the corridor earlier that morning. She did not come early enough to see that... I’m not a soldier to follow the rigid instructions as when to do what.” (#15)

4. Readiness for  
discharge

4.1 “When he [resident] reported to the senior doctor that ‘she’s going to be discharged today’ I thought what’s going on, he must be insane. I was not well enough. I’m stilling having this right facial paralysis. I still can’t close my right eye tightly” (#20)

4.2 “I was happy to go home only 3 days after surgery, but I wasn’t totally pain free at that time. I couldn’t help thinking maybe I should stay for another couple of days and then go home in a better condition?” (#9)

1  
2  
3  
4  
5 4.3 “Here in the hospital my son and daughter are around. They are using their annual leave for my hospitalization.  
6 But once I go home they’ll have their own family and children to look after... They live quite far away... My  
7 husband, he has never done any housework at home. If I don’t cook, he will starve. How can you expect him to take  
8 care of me?” (#7)  
9

10 4.4 “My daughter really devoted herself to helping me recover from the surgery and I know that she wanted me home.  
11 But she is not a nurse anyway. I simply believe that it is safer to stay in the hospital. You are surrounded by medical  
12 staff so if there’s anything going wrong they will find it out and deal with it quickly.” (#23)  
13

14 4.5 “I don’t trust the community hospitals and I will certainly go back to the hospital where I had my surgery if  
15 anything is wrong. I’m not living close to the hospital. And I know that it’s a busy center and there is a huge number  
16 of patients to be admitted. What if they can’t guarantee a bed if I need readmission?” (#40)  
17

18 5.1 “This cell phone app works way much better than phone calls. I never called the ward even though I had the  
19 number. You never know whether the people answers the phone really know whom you are. But it is the doctor who  
20 did my surgery and took care of me that is now interacting with me on this app. He knows my condition.” (#20)  
21

22 5.2 “I know that the doctors are always busy doing the surgeries and dealing with new patients so you don’t want to  
23 bother them in the middle of their work. I just left a message to my doctor and whenever he got time he would reply or  
24 call back. In this way my questions are answered and I don’t feel myself as a burden to him.” (#9)  
25

## 5. Follow-up

26 5.3 “The third day after I went home I had a funny feeling around the wound. There was a small lump next to the  
27 wound which felt soft. My son took a picture of that with his cell phone and sent it to the doctors. They called me to  
28 go to the clinic. It turned out that I developed some water under the scalp and they fixed it easily. That was  
29 unimaginably convenient.” (#21)  
30  
31

---

**Supplemental Table 1. Univariate analysis for predictors of satisfaction in the ERAS group**

| Variable                | Patient satisfaction  |            |                       |            |                       |            |                       |            |                       |            |                       |            |
|-------------------------|-----------------------|------------|-----------------------|------------|-----------------------|------------|-----------------------|------------|-----------------------|------------|-----------------------|------------|
|                         | Overall Satisfaction  |            | Information           |            | Medical care          |            | Nursing care          |            | Enhanced recovery     |            | Comfort & others      |            |
|                         | Mean<br>(95% CI)      | P<br>value |
| Age (yrs)               |                       | 0.332      |                       | 0.070      |                       | 0.915      |                       | 0.784      |                       | 0.852      |                       | 0.650      |
| <50                     | 91.6 (89.7<br>~ 93.5) |            | 16.9 (16.1<br>~ 17.6) |            | 19.0 (18.5<br>~ 19.4) |            | 19.1 (18.7<br>~ 19.5) |            | 18.5 (17.7<br>~ 19.2) |            | 18.1 (17.5<br>~ 18.8) |            |
| ≥50                     | 92.8 (91.0<br>~ 94.7) |            | 17.8 (17.1<br>~ 18.5) |            | 18.9 (18.3<br>~ 19.5) |            | 19.2 (18.8<br>~ 19.6) |            | 18.5 (17.9<br>~ 19.2) |            | 18.3 (17.7<br>~ 18.9) |            |
| Sex                     |                       | 0.770      |                       | 0.865      |                       | 0.614      |                       | 0.522      |                       | 0.757      |                       | 0.639      |
| Male                    | 92.5 (89.6<br>~ 95.4) |            | 17.5 (16.2<br>~ 18.7) |            | 19.1 (18.4<br>~ 19.8) |            | 19.3 (18.7<br>~ 19.9) |            | 18.6 (17.7<br>~ 19.6) |            | 18.1 (17.0<br>~ 19.1) |            |
| Female                  | 92.1 (90.7<br>~ 93.6) |            | 17.4 (16.8<br>~ 17.9) |            | 18.9 (18.5<br>~ 19.3) |            | 19.1 (18.8<br>~ 19.4) |            | 18.5 (17.9<br>~ 19.0) |            | 18.3 (17.8<br>~ 18.8) |            |
| Education               |                       | 0.795      |                       | 0.525      |                       | 0.142      |                       | 0.864      |                       | 0.623      |                       | 0.187      |
| No<br>education/Primary | 91.9 (87.4<br>~ 96.3) |            | 17.8 (16.2<br>~ 19.4) |            | 18.4 (17.0<br>~ 19.8) |            | 19.1 (18.6<br>~ 19.7) |            | 18.3 (17.4<br>~ 19.4) |            | 18.4 (17.4<br>~ 19.4) |            |
| Secondary/College       | 92.3 (91.0<br>~ 93.7) |            | 17.3 (16.8<br>~ 17.9) |            | 19.1 (18.7<br>~ 19.4) |            | 19.2 (18.9<br>~ 19.5) |            | 18.2 (17.7<br>~ 18.7) |            | 18.2 (17.7<br>~ 18.7) |            |
| Occupation              |                       | 0.280      |                       | 0.624      |                       | 0.105      |                       | 0.019      |                       | 0.955      |                       | 0.485      |
| Employed                | 92.9 (90.9<br>~ 94.9) |            | 17.4 (16.6<br>~ 18.3) |            | 19.4 (19.0<br>~ 19.8) |            | 19.3 (18.9<br>~ 19.7) |            | 18.4 (17.6<br>~ 19.2) |            | 18.4 (17.6<br>~ 19.1) |            |
| Unemployed              | 93.5 (89.2<br>~ 97.8) |            | 17.9 (16.2<br>~ 19.6) |            | 18.8 (17.6<br>~ 19.9) |            | 19.8 (19.4<br>~ 20.1) |            | 18.5 (17.0<br>~ 20.0) |            | 18.6 (17.5<br>~ 19.7) |            |

|                                   |                          |                       |                       |                       |                       |                       |
|-----------------------------------|--------------------------|-----------------------|-----------------------|-----------------------|-----------------------|-----------------------|
| Homemaker/<br>Student/Retired     | 91.0<br>(91.0 ~<br>93.5) | 17.2 (16.4<br>~ 17.9) | 18.6 (18.0<br>~ 19.2) | 18.9 (18.4<br>~ 19.2) | 18.6 (17.9<br>~ 19.3) | 18.0 (17.3<br>~ 18.6) |
| Marital status                    | 0.653                    | 0.779                 | 0.689                 | 0.305                 | 0.183                 | 0.602                 |
| Unmarried<br>(Single/divorced)    | 93.3 (79.0<br>~ 107.7)   | 17.7 (11.4<br>~ 23.9) | 18.7 (15.8<br>~ 21.5) | 18.7 (14.9<br>~ 22.5) | 19.7 (18.2<br>~ 21.1) | 18.7 (14.9<br>~ 22.5) |
| Married                           | 92.2 (90.9<br>~ 93.5)    | 17.4 (16.9<br>~ 17.9) | 19.0 (18.6<br>~ 19.3) | 19.2 (19.0<br>~ 19.5) | 18.4 (17.9<br>~ 18.9) | 18.2 (17.8<br>~ 18.7) |
| ASA grades                        | 0.124                    | 0.611                 | 0.004                 | 0.119                 | 0.851                 | 0.595                 |
| Grade I                           | 90.3 (88.3<br>~ 92.4)    | 17.1 (15.9<br>~ 18.3) | 17.9 (16.8<br>~ 18.9) | 18.8 (18.0<br>~ 19.5) | 18.4 (17.1<br>~ 19.8) | 18.1 (17.5<br>~ 18.7) |
| Grade II                          | 92.8 (91.2<br>~ 94.4)    | 17.4 (16.8<br>~ 18.1) | 19.1 (18.8<br>~ 19.5) | 19.3 (19.0<br>~ 19.6) | 18.6 (18.0<br>~ 19.1) | 18.4 (17.9<br>~ 18.9) |
| Length of<br>procedure (hrs)      | 0.493                    | 0.738                 | 0.384                 | 0.195                 | 0.313                 | 0.903                 |
| <3                                | 91.0 (86.8<br>~ 95.2)    | 17.5 (16.0<br>~ 19.0) | 18.5 (17.2<br>~ 19.8) | 18.8 (17.9<br>~ 19.6) | 18.0 (16.2<br>~ 19.8) | 18.3 (17.3<br>~ 19.2) |
| ≥3                                | 92.2 (90.7<br>~ 93.7)    | 17.3 (16.6<br>~ 17.9) | 18.9 (18.5<br>~ 19.3) | 19.2 (18.9<br>~ 19.5) | 18.6 (18.1<br>~ 19.2) | 18.2 (17.6<br>~ 18.7) |
| Blood loss during<br>surgery (ml) | 0.973                    | 0.564                 | 0.496                 | 0.054                 | 0.685                 | 0.693                 |
| <300                              | 92.3 (90.0<br>~ 94.6)    | 17.6 (16.7<br>~ 18.5) | 18.8 (18.2<br>~ 19.4) | 19.0 (18.5<br>~ 19.4) | 18.6 (17.8<br>~ 19.4) | 18.4 (17.8<br>~ 19.0) |
| ≥300                              | 92.3 (90.7<br>~ 94.0)    | 17.3 (16.6<br>~ 18.0) | 19.0 (18.6<br>~ 19.5) | 19.4 (19.1<br>~ 19.7) | 18.4 (17.8<br>~ 19.0) | 18.2 (17.6<br>~ 18.8) |

|    |                     |            |            |            |            |            |            |       |
|----|---------------------|------------|------------|------------|------------|------------|------------|-------|
| 1  |                     |            |            |            |            |            |            |       |
| 2  |                     |            |            |            |            |            |            |       |
| 3  |                     |            |            |            |            |            |            |       |
| 4  |                     |            |            |            |            |            |            |       |
| 5  | PONV VAS            |            | 0.036      | 0.359      | 0.142      | 0.134      | 0.011      | 0.809 |
| 6  | Mild (1-4)          | 92.8 (91.5 | 17.5 (16.9 | 19.1 (18.7 | 19.3 (19.0 | 18.8 (18.4 | 18.3 (17.8 |       |
| 7  |                     | ~ 94.1)    | ~ 18.1)    | ~ 19.4)    | ~ 19.5)    | ~ 19.2)    | ~ 18.7)    |       |
| 8  | Moderate            | 89.4 (85.3 | 16.9 (15.2 | 18.4 (17.0 | 18.8 (17.8 | 17.3 (15.2 | 18.1 (16.9 |       |
| 9  | (5-6)/Severe (7-10) | ~ 93.5)    | ~ 18.5)    | ~ 19.8)    | ~ 19.7)    | ~ 19.3)    | ~ 19.3)    |       |
| 10 |                     |            |            |            |            |            |            |       |
| 11 | Preoperative        |            | 0.684      | 0.446      | 0.853      | 0.196      | 0.363      | 0.516 |
| 12 | carbohydrate        |            |            |            |            |            |            |       |
| 13 | loading             |            |            |            |            |            |            |       |
| 14 |                     |            |            |            |            |            |            |       |
| 15 | Yes                 | 92.1 (90.8 | 17.3 (16.8 | 19.0 (18.6 | 19.1 (18.8 | 18.6 (18.1 | 18.2 (17.7 |       |
| 16 |                     | ~ 93.5)    | ~ 17.9)    | ~ 19.3)    | ~ 19.4)    | ~ 19.1)    | ~ 18.7)    |       |
| 17 | No                  | 92.9 (88.3 | 17.9 (16.4 | 18.9 (17.5 | 19.6 (19.1 | 18.0 (16.3 | 18.6 (17.4 |       |
| 18 |                     | ~ 97.4)    | ~ 19.3)    | ~ 20.2)    | ~ 20.1)    | ~ 19.7)    | ~ 19.8)    |       |
| 19 |                     |            |            |            |            |            |            |       |
| 20 | Absorbable skin     |            | 0.071      | 0.977      | 0.004      | 0.543      | 0.011      | 0.982 |
| 21 | suture              |            |            |            |            |            |            |       |
| 22 |                     |            |            |            |            |            |            |       |
| 23 | Yes                 | 92.8 (91.4 | 17.4 (16.8 | 19.2 (18.8 | 19.2 (18.9 | 18.8 (18.3 | 18.3 (17.7 |       |
| 24 |                     | ~ 94.2)    | ~ 18.0)    | ~ 19.5)    | ~ 19.5)    | ~ 19.2)    | ~ 18.8)    |       |
| 25 | No                  | 89.8 (86.9 | 17.4 (15.9 | 17.9 (16.6 | 19.0 (18.4 | 17.3 (15.8 | 18.3 (17.7 |       |
| 26 |                     | ~ 92.6)    | ~ 18.9)    | ~ 19.2)    | ~ 19.6)    | ~ 18.7)    | ~ 18.8)    |       |
| 27 |                     |            |            |            |            |            |            |       |
| 28 | Mechanical          |            | 0.724      | 0.695      | 0.553      | 0.787      | 0.422      | 0.693 |
| 29 | prophylaxis for     |            |            |            |            |            |            |       |
| 30 | DVT                 |            |            |            |            |            |            |       |
| 31 |                     |            |            |            |            |            |            |       |
| 32 | Yes                 | 92.3 (90.6 | 17.4 (16.7 | 19.0 (18.6 | 19.2 (18.9 | 18.4 (17.8 | 18.3 (17.7 |       |
| 33 |                     | ~ 94.0)    | ~ 18.1)    | ~ 19.4)    | ~ 19.6)    | ~ 19.0)    | ~ 18.9)    |       |
| 34 | No                  | 92.8 (90.7 | 17.6 (16.7 | 18.8 (18.1 | 19.2 (18.7 | 18.8 (18.0 | 18.4 (17.9 |       |
| 35 |                     | ~ 94.9)    | ~ 18.5)    | ~ 19.5)    | ~ 19.6)    | ~ 19.5)    | ~ 19.0)    |       |
| 36 |                     |            |            |            |            |            |            |       |
| 37 |                     |            |            |            |            |            |            |       |
| 38 |                     |            |            |            |            |            |            |       |
| 39 |                     |            |            |            |            |            |            |       |
| 40 |                     |            |            |            |            |            |            |       |
| 41 |                     |            |            |            |            |            |            |       |
| 42 |                     |            |            |            |            |            |            |       |
| 43 |                     |            |            |            |            |            |            |       |
| 44 |                     |            |            |            |            |            |            |       |
| 45 |                     |            |            |            |            |            |            |       |
| 46 |                     |            |            |            |            |            |            |       |

|                                       |                    |                    |                    |                    |                    |                    |       |
|---------------------------------------|--------------------|--------------------|--------------------|--------------------|--------------------|--------------------|-------|
| Removal of urinary drainage (hrs)     |                    | 0.421              | 0.298              | 0.777              | 0.240              | 0.816              | 0.664 |
| ≤6                                    | 91.9 (90.5 ~93.4)  | 17.2 (16.6 ~ 17.8) | 19.0 (18.5 ~ 19.4) | 19.1 (18.8 ~ 19.4) | 18.5 (17.9 ~ 19.0) | 18.2 (17.7 ~ 18.8) |       |
| >6                                    | 93.1 (90.2 ~ 96.0) | 17.8 (16.7 ~ 18.9) | 18.9 (18.3 ~ 19.5) | 19.4 (19.1 ~ 19.8) | 18.6 (17.7 ~ 19.5) | 18.4 (17.7 ~ 19.1) |       |
| Time to first oral solid intake (hrs) |                    | 0.947              | 0.709              | 0.559              | 0.434              | 0.399              | 0.549 |
| ≤24                                   | 92.2 (90.4 ~ 94.0) | 17.5 (16.8 ~ 18.2) | 18.8 (18.3 ~ 19.4) | 19.1 (18.7 ~ 19.5) | 18.7 (18.1 ~ 19.3) | 18.1 (17.5 ~ 18.7) |       |
| >24                                   | 92.3 (90.3 ~ 94.3) | 17.3 (16.4 ~ 18.1) | 19.1 (18.6 ~ 19.5) | 19.3 (18.9 ~ 19.6) | 18.3 (17.5 ~ 19.1) | 18.4 (17.7 ~ 19.0) |       |
| Ambulation on POD 1                   |                    | 0.996              | 0.774              | 0.821              | 0.483              | 0.630              | 0.542 |
| Yes                                   | 92.2 (90.6 ~ 93.9) | 17.5 (16.8 ~ 18.1) | 19.0 (18.5 ~ 19.5) | 19.1 (18.7 ~ 19.5) | 18.6 (18.0 ~ 19.2) | 18.1 (17.6 ~ 18.7) |       |
| No                                    | 92.2 (90.0 ~ 94.5) | 17.3 (16.4 ~ 18.2) | 18.9 (18.3 ~ 19.4) | 19.3 (19.0 ~ 19.6) | 18.4 (17.5 ~ 19.2) | 18.4 (17.7 ~ 19.1) |       |
| Postoperative wound drainage          |                    | 0.246              | 0.977              | 0.142              | 0.864              | 0.081              | 0.809 |
| No                                    | 92.6 (91.2 ~ 94.0) | 17.4 (16.8 ~ 18.0) | 19.1 (18.7 ~ 19.4) | 19.2 (18.9 ~ 19.5) | 18.7 (18.2 ~ 19.2) | 18.3 (17.8 ~ 18.8) |       |
| Yes                                   | 90.6 (87.1 ~ 94.1) | 17.4 (16.0 ~ 18.7) | 18.4 (17.5 ~ 19.3) | 19.1 (18.6 ~ 19.7) | 17.6 (16.4 ~ 18.9) | 18.1 (17.2 ~ 19.1) |       |



|    |                     |            |            |            |            |            |            |       |  |
|----|---------------------|------------|------------|------------|------------|------------|------------|-------|--|
| 1  |                     |            |            |            |            |            |            |       |  |
| 2  |                     |            |            |            |            |            |            |       |  |
| 3  |                     |            |            |            |            |            |            |       |  |
| 4  |                     |            |            |            |            |            |            |       |  |
| 5  | Pain VAS on         |            | 0.006      | 0.853      | 0.054      | 0.001      | 0.020      | 0.067 |  |
| 6  | POD1                |            |            |            |            |            |            |       |  |
| 7  | Mild (1-4)          | 93.1 (91.7 | 17.4 (16.8 | 19.1 (18.8 | 19.4 (19.1 | 18.8 (18.3 | 18.4 (18.0 |       |  |
| 8  |                     | ~ 94.5)    | ~18.0)     | ~19.5)     | ~ 19.7)    | ~ 19.3)    | ~18.9)     |       |  |
| 9  | Moderate            | 89.0 (86.7 | 17.3 (16.3 | 18.3 (17.2 | 18.4 (18.0 | 17.5 (16.3 | 17.5 (16.4 |       |  |
| 10 | (5-6)/Severe (7-10) | ~ 91.3)    | ~ 18.3)    | ~ 19.4)    | ~ 18.8)    | ~ 18.7)    | ~ 18.6)    |       |  |
| 11 | Postoperative LOS   |            | 0.219      | 0.971      | 0.017      | 0.829      | 0.045      | 0.837 |  |
| 12 | (d)                 |            |            |            |            |            |            |       |  |
| 13 | ≤4                  | 93.1 (91.0 | 17.4 (16.6 | 19.4 (19.0 | 19.2 (18.7 | 19.0 (18.4 | 18.2 (17.4 |       |  |
| 14 |                     | ~ 95.2)    | ~ 18.2)    | ~ 19.8)    | ~ 19.6)    | ~ 19.6)    | ~ 19.0)    |       |  |
| 15 | >4                  | 91.5 (90.0 | 17.4 (16.7 | 18.6 (18.0 | 19.2 (18.9 | 18.1 (17.4 | 18.3 (17.8 |       |  |
| 16 |                     | ~ 93.2)    | ~ 18.1)    | ~ 19.1)    | ~ 19.5)    | ~ 18.8)    | ~ 18.8)    |       |  |

ASA = American Society of Anesthesiologists', DVT = deep vein thrombosis, LOS = length of stay, POD = postoperative day, PONV = postoperative nausea and vomiting, VAS = visual analog scale

1  
2  
3 Additional file 1 Summary of the questions included in the patient satisfaction  
4 questionnaire at discharge.

5  
6 Module 1- Information

- 7 - Information delivery  
8 - Patient counseling  
9  
10 - Doctors' and nurses' interest in patients' questions  
11 - Contradictory orders

12 Module 2- Medical care

- 13 - Experience of operation  
14 - Doctors' rounds  
15 - Postoperative symptom management  
16 - Explanations about health condition & treatment

17  
18  
19 Module 3- Nursing care

- 20 - Preoperative preparation  
21 - Postoperative nursing care  
22 - Nurses' empathy  
23 - Response to patient/family need

24  
25 Module 4- Enhanced recovery

- 26 - Nutritional intervention  
27 - Functional recovery assistance  
28 - Discharging criteria & follow-up arrangement  
29 - Outcome of surgery/hospitalization

30  
31  
32 Module 5- Comfort & others

- 33 - Environmental conditions  
34 - Sense of security  
35 - Cost  
36 - Administration & logistics  
37  
38  
39  
40  
41  
42  
43  
44  
45  
46  
47  
48  
49  
50  
51  
52  
53  
54  
55  
56  
57  
58  
59  
60

1  
2  
3 Additional file 2 Semi-structured interview guide at 30-day follow-up after discharge.

4 Warm up

- 5  
6 - Self introduction  
7 - Thank patient for participating and confirm consent verbally  
8 - Assess 30-day follow-up KPS  
9

10 General questions

- 11 - How did you feel about the recent hospital stay and the ERAS program?  
12 - What concerns you most about the ERAS program?  
13 - What do you recall in participating the ERAS program?  
14

15 Information transfer

- 16 - How did you feel about the education and counseling when you were enrolled for  
17 the ERAS program?  
18 - Do you recall any differences between the written information and verbal  
19 information?  
20 - Did the doctors' and nurses' respond to your questions and concerns adequately?  
21  
22

23 Symptom management & accelerated recovery

- 24 - What were your expectations about pain/fatigue/nausea and vomiting after  
25 surgery?  
26 - Was symptom control better/worse than you expected?  
27 - How was your recovery process after surgery? Was it faster/slower than you  
28 expected? Was it harder/easier than you expected?  
29  
30

31 Discharge & follow-up

- 32 - How did you feel about the time and condition at discharge? Did you feel ready to  
33 be discharged? Did you have any concern about early discharge?  
34 - Did you have any discomfort or problem after discharge? Did you get any  
35 help/guidance from the primary doctors?  
36 - How was your family support after discharge?  
37  
38

39 Cool down

- 40 - Encourage patient to talk about their experience/concerns/suggestions not  
41 mentioned in the previous questions  
42  
43  
44  
45  
46  
47  
48  
49  
50  
51  
52  
53  
54  
55  
56  
57  
58  
59  
60

## Standards for Reporting Qualitative Research (SRQR) <sup>a</sup> checklist

| No.                       | Topic                                       | Item                                                                                                                                                                                                                                                                                                                                             | Reported on page No |
|---------------------------|---------------------------------------------|--------------------------------------------------------------------------------------------------------------------------------------------------------------------------------------------------------------------------------------------------------------------------------------------------------------------------------------------------|---------------------|
| <b>Title and abstract</b> |                                             |                                                                                                                                                                                                                                                                                                                                                  |                     |
| S1                        | Title                                       | Concise description of the nature and topic of the study Identifying the study as qualitative or indicating the approach (e.g., ethnography, grounded theory) or data collection methods (e.g., interview, focus group) is recommended                                                                                                           | 1                   |
| S2                        | Abstract                                    | Summary of key elements of the study using the abstract format of the intended publication; typically includes background, purpose, methods, results, and conclusions                                                                                                                                                                            | 3-4                 |
| <b>Introduction</b>       |                                             |                                                                                                                                                                                                                                                                                                                                                  |                     |
| S3                        | Problem formulation                         | Description and significance of the problem/phenomenon studied; review of relevant theory and empirical work; problem statement                                                                                                                                                                                                                  | 4-5                 |
| S4                        | Purpose or research question                | Purpose of the study and specific objectives or questions                                                                                                                                                                                                                                                                                        | 5                   |
| <b>Methods</b>            |                                             |                                                                                                                                                                                                                                                                                                                                                  |                     |
| S5                        | Qualitative approach and research paradigm  | Qualitative approach (e.g., ethnography, grounded theory, case study, phenomenology, narrative research) and guiding theory if appropriate; identifying the research paradigm (e.g., postpositivist, constructivist/ interpretivist) is also recommended; rationale <sup>b</sup>                                                                 | 7                   |
| S6                        | Researcher characteristics and reflexivity  | Researchers' characteristics that may influence the research, including personal attributes, qualifications/experience, relationship with participants, assumptions, and/or presuppositions; potential or actual interaction between researchers' characteristics and the research questions, approach, methods, results, and/or transferability | 7                   |
| S7                        | Context                                     | Setting/site and salient contextual factors; rationale <sup>b</sup>                                                                                                                                                                                                                                                                              | 7                   |
| S8                        | Sampling strategy                           | How and why research participants, documents, or events were selected; criteria for deciding when no further sampling was necessary (e.g., sampling saturation); rationale <sup>b</sup>                                                                                                                                                          | 7                   |
| S9                        | Ethical issues pertaining to human subjects | Documentation of approval by an appropriate ethics review board and participant consent, or explanation for lack thereof; other confidentiality and data security issues                                                                                                                                                                         | 7-8                 |
| S10                       | Data collection methods                     | Types of data collected; details of data collection procedures including (as                                                                                                                                                                                                                                                                     | 5-7                 |

appropriate) start and stop dates of data collection and analysis, iterative process, triangulation of sources/methods, and modification of procedures in response to evolving study findings; rationale<sup>b</sup>

Description of instruments (e.g., interview guides, questionnaires) and devices (e.g., audio recorders) used for data collection; if/how the instrument(s) changed over the course of the study

Number and relevant characteristics of participants, documents, or events included in the study; level of participation (could be reported in results)

Methods for processing data prior to and during analysis, including transcription, data entry, data management and security, verification of data integrity, data coding, and anonymization/deidentification of excerpts

Process by which inferences, themes, etc., were identified and developed, including the researchers involved in data analysis; usually references a specific paradigm or approach; rationale<sup>b</sup>

Techniques to enhance trustworthiness and credibility of data analysis (e.g., member checking, audit trail, triangulation); rationale<sup>b</sup>

### Results/findings

Main findings (e.g., interpretations, inferences, and themes); might include development of a theory or model, or integration with prior research or theory

Evidence (e.g., quotes, field notes, text excerpts, photographs) to substantiate analytic findings

### Discussion

Short summary of main findings; explanation of how findings and conclusions connect to, support, elaborate on, or challenge conclusions of earlier scholarship; discussion of scope of application/ generalizability; identification of unique contribution(s) to scholarship in a discipline or field

Trustworthiness and limitations of findings

### Other

Potential sources of influence or perceived influence on study conduct and conclusions; how these were managed

Sources of funding and other support; role of funders in data collection, interpretation, and reporting

S11 Data collection instruments and technologies

S12 Units of study

S13 Data processing

S14 Data analysis

S15 Techniques to enhance trustworthiness

S16 Synthesis and interpretation

S17 Links to empirical data

S18 Integration with prior work, implications, transferability, and contribution(s) to the field

S19 Limitations

S20 Conflicts of interest

S21 Funding

7,  
Additional  
file 2

7, 9,11

7-8

9

7-9

11-13

Table 4

15-17

17

2

2

1 <sup>a</sup>The authors created the SRQR by searching the literature to identify guidelines, reporting standards, and critical appraisal criteria for qualitative research; reviewing the reference lists of  
2 retrieved sources; and contacting experts to gain feedback. The SRQR aims to improve the transparency of all aspects of qualitative research by providing clear standards for reporting  
3 qualitative research.

4 <sup>b</sup>The rationale should briefly discuss the justification for choosing that theory, approach, method, or technique rather than other options available, the assumptions and limitations implicit in  
5 those choices, and how those choices influence study conclusions and transferability. As appropriate, the rationale for several items might be discussed together.  
6  
7  
8  
9  
10  
11  
12  
13  
14  
15  
16  
17  
18  
19  
20  
21  
22  
23  
24  
25  
26  
27  
28  
29  
30  
31  
32  
33  
34  
35  
36  
37  
38  
39  
40  
41  
42

For peer review only

## Consolidated criteria for reporting qualitative studies (COREQ): 32-item checklist

| No Item                                     | Guide questions/description                                                                                                                                     | Answer                                                                                                                      |
|---------------------------------------------|-----------------------------------------------------------------------------------------------------------------------------------------------------------------|-----------------------------------------------------------------------------------------------------------------------------|
| Domain 1: Research team and reflexivity     |                                                                                                                                                                 |                                                                                                                             |
| Personal Characteristics                    |                                                                                                                                                                 |                                                                                                                             |
| 1. Interviewer/facilitator                  | Which author/s conducted the interview or focus group?                                                                                                          | BL, YW, YZ, TZ, YX, LC, YW                                                                                                  |
| 2. Credentials                              | What were the researcher's credentials? <i>E.g. PhD, MD</i>                                                                                                     | MD, PhD                                                                                                                     |
| 3. Occupation                               | What was their occupation at the time of the study?                                                                                                             | Doctors                                                                                                                     |
| 4. Gender                                   | Was the researcher male or female?                                                                                                                              | Female: BL, Male: all others                                                                                                |
| 5. Experience and training                  | What experience or training did the researcher have?                                                                                                            | Finished residency training in<br>Neurosurgery: BL, YZ, YX, YW<br>Ongoing residency training in<br>Neurosurgery: YW, TZ, LC |
| Relationship with participants              |                                                                                                                                                                 |                                                                                                                             |
| 6. Relationship established                 | Was a relationship established prior to study commencement?                                                                                                     | Yes                                                                                                                         |
| 7. Participant knowledge of the interviewer | What did the participants know about the researcher? <i>e.g. personal goals, reasons for doing the research</i>                                                 | Reasons for doing the research                                                                                              |
| 8. Interviewer characteristics              | What characteristics were reported about the interviewer/facilitator? <i>e.g. Bias, assumptions, reasons and interests in the research topic</i>                | Reasons and interests in the research topic                                                                                 |
| Domain 2: Study design                      |                                                                                                                                                                 |                                                                                                                             |
| Theoretical framework                       |                                                                                                                                                                 |                                                                                                                             |
| 9. Methodological orientation and Theory    | What methodological orientation was stated to underpin the study? <i>e.g. grounded theory, discourse analysis, ethnography, phenomenology, content analysis</i> | Phenomenology                                                                                                               |
| Participant selection                       |                                                                                                                                                                 |                                                                                                                             |
| 10. Sampling                                | How were participants selected? <i>e.g. purposive, convenience, consecutive, snowball</i>                                                                       | Purposive                                                                                                                   |
| 11. Method of approach                      | How were participants approached? <i>e.g. face-to-face, telephone, mail, email</i>                                                                              | Telephone                                                                                                                   |
| 12. Sample size                             | How many participants were in the study?                                                                                                                        | 46                                                                                                                          |
| 13. Non-participation                       | How many people refused to participate or dropped out? Reasons?                                                                                                 | 0                                                                                                                           |
| Setting                                     |                                                                                                                                                                 |                                                                                                                             |

|                |                                    |                                                                                                                                             |                                                |
|----------------|------------------------------------|---------------------------------------------------------------------------------------------------------------------------------------------|------------------------------------------------|
| 1<br>2         | 14. Setting of data collection     | Where was the data collected? <i>e.g. home, clinic, workplace</i>                                                                           | Home                                           |
| 3<br>4         | 15. Presence of non-participants   | Was anyone else present besides the participants and researchers?                                                                           | Yes, sometimes patients' relatives.            |
| 5<br>6<br>7    | 16. Description of sample          | What are the important characteristics of the sample? <i>e.g. demographic data, date</i>                                                    | Demographic data varies                        |
| 8              | Data collection                    |                                                                                                                                             |                                                |
| 9<br>10<br>11  | 17. Interview guide                | Were questions, prompts, guides provided by the authors? Was it pilot tested?                                                               | Yes (see Additional file 2). Not pilot tested. |
| 12             | 18. Repeat interviews              | Were repeat interviews carried out? If yes, how many?                                                                                       | No                                             |
| 13<br>14<br>15 | 19. Audio/visual recording         | Did the research use audio or visual recording to collect the data?                                                                         | Yes audio recording                            |
| 16<br>17       | 20. Field notes                    | Were field notes made during and/or after the interview or focus group?                                                                     | Yes during and immediately after the interview |
| 18             | 21. Duration                       | What was the duration of the interviews or focus group?                                                                                     | 15~30 min                                      |
| 19             | 22. Data saturation                | Was data saturation discussed?                                                                                                              | Yes                                            |
| 20<br>21<br>22 | 23. Transcripts returned           | Were transcripts returned to participants for comment and/or correction?                                                                    | No                                             |
| 23             | Domain 3: Analysis and findings    |                                                                                                                                             |                                                |
| 24             | Data analysis                      |                                                                                                                                             |                                                |
| 25<br>26<br>27 | 24. Number of data coders          | How many data coders coded the data?                                                                                                        | 3                                              |
| 28<br>29       | 25. Description of the coding tree | Did authors provide a description of the coding tree?                                                                                       | No                                             |
| 30             | 26. Derivation of themes           | Were themes identified in advance or derived from the data?                                                                                 | Derived from data                              |
| 31<br>32       | 27. Software                       | What software, if applicable, was used to manage the data?                                                                                  | NA                                             |
| 33<br>34       | 28. Participant checking           | Did participants provide feedback on the findings?                                                                                          | Yes                                            |
| 35             | Reporting                          |                                                                                                                                             |                                                |
| 36<br>37       | 29. Quotations presented           | Were participant quotations presented to illustrate the themes / findings?<br>Was each quotation identified? <i>e.g. participant number</i> | Yes. Identified with participant number.       |
| 38<br>39       | 30. Data and findings consistent   | Was there consistency between the data presented and the findings?                                                                          | Yes                                            |
| 40<br>41<br>42 | 31. Clarity of major               | Were major themes clearly presented in the findings?                                                                                        | Yes                                            |



|   |                     |                                                                        |    |
|---|---------------------|------------------------------------------------------------------------|----|
| 1 | themes              |                                                                        |    |
| 2 | 2. Clarity of minor | Is there a description of diverse cases or discussion of minor themes? | No |
| 3 | themes              |                                                                        |    |

For peer review only

4  
5  
6  
7  
8  
9  
10  
11  
12  
13  
14  
15  
16  
17  
18  
19  
20  
21  
22  
23  
24  
25  
26  
27  
28  
29  
30  
31  
32  
33  
34  
35  
36  
37  
38  
39  
40  
41  
42

44  
45  
46
