# Supplementary material for: Neurosurgical enhanced recovery after surgery (ERAS) programme for elective craniotomies: are patients satisfied with their experiences? A quantitative and qualitative analysis
Source: PubMed Central journal article supplement — BMJ Open. 2019 Nov 10;9(11):e028706. doi: 10.1136/bmjopen-2018-028706 (PMC6858174; doi:10.1136/bmjopen-2018-028706), 2019-11-10
Supplement: bmjopen-2018-028706supp002.pdf [file bmjopen-2018-028706supp002.pdf]

Additional file 2 Semi-structured interview guide at 30-day follow-up after discharge.

Warm up

- Self introduction
- Thank patient for participating and confirm consent verbally
- Assess 30-day follow-up KPS

General questions

- How did you feel about the recent hospital stay and the ERAS program?
- What concerns you most about the ERAS program?
- What do you recall in participating the ERAS program?

Information transfer

- How did you feel about the education and counseling when you were enrolled for the ERAS program?
- Do you recall any differences between the written information and verbal information?
- Did the doctors' and nurses' respond to your questions and concerns adequately?

Symptom management & accelerated recovery

- What were your expectations about pain/fatigue/nausea and vomiting after surgery?
- Was symptom control better/worse than you expected?
- How was your recovery process after surgery? Was it faster/slower than you expected? Was it harder/easier than you expected?

Discharge & follow-up

- How did you feel about the time and condition at discharge? Did you feel ready to be discharged? Did you have any concern about early discharge?
- Did you have any discomfort or problem after discharge? Did you get any help/guidance from the primary doctors?
- How was your family support after discharge?

Cool down

- Encourage patient to talk about their experience/concerns/suggestions not mentioned in the previous questions
