# Supplementary material for: Neurosurgical enhanced recovery after surgery (ERAS) programme for elective craniotomies: are patients satisfied with their experiences? A quantitative and qualitative analysis
Source: PubMed Central journal article supplement — BMJ Open. 2019 Nov 10;9(11):e028706. doi: 10.1136/bmjopen-2018-028706 (PMC6858174; doi:10.1136/bmjopen-2018-028706), 2019-11-10
Supplement: bmjopen-2018-028706supp003.pdf [file bmjopen-2018-028706supp003.pdf]

**Supplemental Table 1. Univariate analysis for predictors of satisfaction in the ERAS group**

| Variable                | Patient satisfaction  |            |                       |            |                       |            |                       |            |                       |            |                       |            |
|-------------------------|-----------------------|------------|-----------------------|------------|-----------------------|------------|-----------------------|------------|-----------------------|------------|-----------------------|------------|
|                         | Overall Satisfaction  |            | Information           |            | Medical care          |            | Nursing care          |            | Enhanced recovery     |            | Comfort & others      |            |
|                         | Mean<br>(95% CI)      | P<br>value |
| Age (yrs)               |                       | 0.332      |                       | 0.070      |                       | 0.915      |                       | 0.784      |                       | 0.852      |                       | 0.650      |
| <50                     | 91.6 (89.7<br>~ 93.5) |            | 16.9 (16.1<br>~ 17.6) |            | 19.0 (18.5<br>~ 19.4) |            | 19.1 (18.7<br>~ 19.5) |            | 18.5 (17.7<br>~ 19.2) |            | 18.1 (17.5<br>~ 18.8) |            |
| ≥50                     | 92.8 (91.0<br>~ 94.7) |            | 17.8 (17.1<br>~ 18.5) |            | 18.9 (18.3<br>~ 19.5) |            | 19.2 (18.8<br>~ 19.6) |            | 18.5 (17.9<br>~ 19.2) |            | 18.3 (17.7<br>~ 18.9) |            |
| Sex                     |                       | 0.770      |                       | 0.865      |                       | 0.614      |                       | 0.522      |                       | 0.757      |                       | 0.639      |
| Male                    | 92.5 (89.6<br>~ 95.4) |            | 17.5 (16.2<br>~ 18.7) |            | 19.1 (18.4<br>~ 19.8) |            | 19.3 (18.7<br>~ 19.9) |            | 18.6 (17.7<br>~ 19.6) |            | 18.1 (17.0<br>~ 19.1) |            |
| Female                  | 92.1 (90.7<br>~ 93.6) |            | 17.4 (16.8<br>~ 17.9) |            | 18.9 (18.5<br>~ 19.3) |            | 19.1 (18.8<br>~ 19.4) |            | 18.5 (17.9<br>~ 19.0) |            | 18.3 (17.8<br>~ 18.8) |            |
| Education               |                       | 0.795      |                       | 0.525      |                       | 0.142      |                       | 0.864      |                       | 0.623      |                       | 0.187      |
| No<br>education/Primary | 91.9 (87.4<br>~ 96.3) |            | 17.8 (16.2<br>~ 19.4) |            | 18.4 (17.0<br>~ 19.8) |            | 19.1 (18.6<br>~ 19.7) |            | 18.3 (17.4<br>~ 19.4) |            | 18.4 (17.4<br>~ 19.4) |            |
| Secondary/College       | 92.3 (91.0<br>~ 93.7) |            | 17.3 (16.8<br>~ 17.9) |            | 19.1 (18.7<br>~ 19.4) |            | 19.2 (18.9<br>~ 19.5) |            | 18.2 (17.7<br>~ 18.7) |            | 18.2 (17.7<br>~ 18.7) |            |
| Occupation              |                       | 0.280      |                       | 0.624      |                       | 0.105      |                       | 0.019      |                       | 0.955      |                       | 0.485      |
| Employed                | 92.9 (90.9<br>~ 94.9) |            | 17.4 (16.6<br>~ 18.3) |            | 19.4 (19.0<br>~ 19.8) |            | 19.3 (18.9<br>~ 19.7) |            | 18.4 (17.6<br>~ 19.2) |            | 18.4 (17.6<br>~ 19.1) |            |
| Unemployed              | 93.5 (89.2<br>~ 97.8) |            | 17.9 (16.2<br>~ 19.6) |            | 18.8 (17.6<br>~ 19.9) |            | 19.8 (19.4<br>~ 20.1) |            | 18.5 (17.0<br>~ 20.0) |            | 18.6 (17.5<br>~ 19.7) |            |

|                                   |                          |                       |                       |                       |                       |                       |
|-----------------------------------|--------------------------|-----------------------|-----------------------|-----------------------|-----------------------|-----------------------|
| Homemaker/<br>Student/Retired     | 91.0<br>(91.0 ~<br>93.5) | 17.2 (16.4<br>~ 17.9) | 18.6 (18.0<br>~ 19.2) | 18.9 (18.4<br>~ 19.2) | 18.6 (17.9<br>~ 19.3) | 18.0 (17.3<br>~ 18.6) |
| Marital status                    | 0.653                    | 0.779                 | 0.689                 | 0.305                 | 0.183                 | 0.602                 |
| Unmarried<br>(Single/divorced)    | 93.3 (79.0<br>~ 107.7)   | 17.7 (11.4<br>~ 23.9) | 18.7 (15.8<br>~ 21.5) | 18.7 (14.9<br>~ 22.5) | 19.7 (18.2<br>~ 21.1) | 18.7 (14.9<br>~ 22.5) |
| Married                           | 92.2 (90.9<br>~ 93.5)    | 17.4 (16.9<br>~ 17.9) | 19.0 (18.6<br>~ 19.3) | 19.2 (19.0<br>~ 19.5) | 18.4 (17.9<br>~ 18.9) | 18.2 (17.8<br>~ 18.7) |
| ASA grades                        | 0.124                    | 0.611                 | 0.004                 | 0.119                 | 0.851                 | 0.595                 |
| Grade I                           | 90.3 (88.3<br>~ 92.4)    | 17.1 (15.9<br>~ 18.3) | 17.9 (16.8<br>~ 18.9) | 18.8 (18.0<br>~ 19.5) | 18.4 (17.1<br>~ 19.8) | 18.1 (17.5<br>~ 18.7) |
| Grade II                          | 92.8 (91.2<br>~ 94.4)    | 17.4 (16.8<br>~ 18.1) | 19.1 (18.8<br>~ 19.5) | 19.3 (19.0<br>~ 19.6) | 18.6 (18.0<br>~ 19.1) | 18.4 (17.9<br>~ 18.9) |
| Length of<br>procedure (hrs)      | 0.493                    | 0.738                 | 0.384                 | 0.195                 | 0.313                 | 0.903                 |
| <3                                | 91.0 (86.8<br>~ 95.2)    | 17.5 (16.0<br>~ 19.0) | 18.5 (17.2<br>~ 19.8) | 18.8 (17.9<br>~ 19.6) | 18.0 (16.2<br>~ 19.8) | 18.3 (17.3<br>~ 19.2) |
| ≥3                                | 92.2 (90.7<br>~ 93.7)    | 17.3 (16.6<br>~ 17.9) | 18.9 (18.5<br>~ 19.3) | 19.2 (18.9<br>~ 19.5) | 18.6 (18.1<br>~ 19.2) | 18.2 (17.6<br>~ 18.7) |
| Blood loss during<br>surgery (ml) | 0.973                    | 0.564                 | 0.496                 | 0.054                 | 0.685                 | 0.693                 |
| <300                              | 92.3 (90.0<br>~ 94.6)    | 17.6 (16.7<br>~ 18.5) | 18.8 (18.2<br>~ 19.4) | 19.0 (18.5<br>~ 19.4) | 18.6 (17.8<br>~ 19.4) | 18.4 (17.8<br>~ 19.0) |
| ≥300                              | 92.3 (90.7<br>~ 94.0)    | 17.3 (16.6<br>~ 18.0) | 19.0 (18.6<br>~ 19.5) | 19.4 (19.1<br>~ 19.7) | 18.4 (17.8<br>~ 19.0) | 18.2 (17.6<br>~ 18.8) |

|                                         |      |                       |                       |                       |                       |                       |                       |
|-----------------------------------------|------|-----------------------|-----------------------|-----------------------|-----------------------|-----------------------|-----------------------|
| PONV VAS                                |      | 0.036                 | 0.359                 | 0.142                 | 0.134                 | 0.011                 | 0.809                 |
| Mild (1-4)                              |      | 92.8 (91.5<br>~ 94.1) | 17.5 (16.9<br>~ 18.1) | 19.1 (18.7<br>~ 19.4) | 19.3 (19.0<br>~ 19.5) | 18.8 (18.4<br>~ 19.2) | 18.3 (17.8<br>~ 18.7) |
| Moderate<br>(5-6)/Severe (7-10)         |      | 89.4 (85.3<br>~ 93.5) | 16.9 (15.2<br>~ 18.5) | 18.4 (17.0<br>~ 19.8) | 18.8 (17.8<br>~ 19.7) | 17.3 (15.2<br>~ 19.3) | 18.1 (16.9<br>~ 19.3) |
| Preoperative<br>carbohydrate<br>loading |      | 0.684                 | 0.446                 | 0.853                 | 0.196                 | 0.363                 | 0.516                 |
| Yes                                     |      | 92.1 (90.8<br>~ 93.5) | 17.3 (16.8<br>~ 17.9) | 19.0 (18.6<br>~ 19.3) | 19.1 (18.8<br>~ 19.4) | 18.6 (18.1<br>~ 19.1) | 18.2 (17.7<br>~ 18.7) |
| No                                      |      | 92.9 (88.3<br>~ 97.4) | 17.9 (16.4<br>~ 19.3) | 18.9 (17.5<br>~ 20.2) | 19.6 (19.1<br>~ 20.1) | 18.0 (16.3<br>~ 19.7) | 18.6 (17.4<br>~ 19.8) |
| Absorbable<br>suture                    | skin | 0.071                 | 0.977                 | 0.004                 | 0.543                 | 0.011                 | 0.982                 |
| Yes                                     |      | 92.8 (91.4<br>~ 94.2) | 17.4 (16.8<br>~ 18.0) | 19.2 (18.8<br>~ 19.5) | 19.2 (18.9<br>~ 19.5) | 18.8 (18.3<br>~ 19.2) | 18.3 (17.7<br>~ 18.8) |
| No                                      |      | 89.8 (86.9<br>~ 92.6) | 17.4 (15.9<br>~ 18.9) | 17.9 (16.6<br>~ 19.2) | 19.0 (18.4<br>~ 19.6) | 17.3 (15.8<br>~ 18.7) | 18.3 (17.7<br>~ 18.8) |
| Mechanical<br>prophylaxis<br>DVT        | for  | 0.724                 | 0.695                 | 0.553                 | 0.787                 | 0.422                 | 0.693                 |
| Yes                                     |      | 92.3 (90.6<br>~ 94.0) | 17.4 (16.7<br>~ 18.1) | 19.0 (18.6<br>~ 19.4) | 19.2 (18.9<br>~ 19.6) | 18.4 (17.8<br>~ 19.0) | 18.3 (17.7<br>~ 18.9) |
| No                                      |      | 92.8 (90.7<br>~ 94.9) | 17.6 (16.7<br>~ 18.5) | 18.8 (18.1<br>~ 19.5) | 19.2 (18.7<br>~ 19.6) | 18.8 (18.0<br>~ 19.5) | 18.4 (17.9<br>~ 19.0) |

|                                       |                    |                    |                    |                    |                    |                    |       |
|---------------------------------------|--------------------|--------------------|--------------------|--------------------|--------------------|--------------------|-------|
| Removal of urinary drainage (hrs)     |                    | 0.421              | 0.298              | 0.777              | 0.240              | 0.816              | 0.664 |
| ≤6                                    | 91.9 (90.5 ~93.4)  | 17.2 (16.6 ~ 17.8) | 19.0 (18.5 ~ 19.4) | 19.1 (18.8 ~ 19.4) | 18.5 (17.9 ~ 19.0) | 18.2 (17.7 ~ 18.8) |       |
| >6                                    | 93.1 (90.2 ~ 96.0) | 17.8 (16.7 ~ 18.9) | 18.9 (18.3 ~ 19.5) | 19.4 (19.1 ~ 19.8) | 18.6 (17.7 ~ 19.5) | 18.4 (17.7 ~ 19.1) |       |
| Time to first oral solid intake (hrs) |                    | 0.947              | 0.709              | 0.559              | 0.434              | 0.399              | 0.549 |
| ≤24                                   | 92.2 (90.4 ~ 94.0) | 17.5 (16.8 ~ 18.2) | 18.8 (18.3 ~ 19.4) | 19.1 (18.7 ~ 19.5) | 18.7 (18.1 ~ 19.3) | 18.1 (17.5 ~ 18.7) |       |
| >24                                   | 92.3 (90.3 ~ 94.3) | 17.3 (16.4 ~ 18.1) | 19.1 (18.6 ~ 19.5) | 19.3 (18.9 ~ 19.6) | 18.3 (17.5 ~ 19.1) | 18.4 (17.7 ~ 19.0) |       |
| Ambulation on POD 1                   |                    | 0.996              | 0.774              | 0.821              | 0.483              | 0.630              | 0.542 |
| Yes                                   | 92.2 (90.6 ~ 93.9) | 17.5 (16.8 ~ 18.1) | 19.0 (18.5 ~ 19.5) | 19.1 (18.7 ~ 19.5) | 18.6 (18.0 ~ 19.2) | 18.1 (17.6 ~ 18.7) |       |
| No                                    | 92.2 (90.0 ~ 94.5) | 17.3 (16.4 ~ 18.2) | 18.9 (18.3 ~ 19.4) | 19.3 (19.0 ~ 19.6) | 18.4 (17.5 ~ 19.2) | 18.4 (17.7 ~ 19.1) |       |
| Postoperative wound drainage          |                    | 0.246              | 0.977              | 0.142              | 0.864              | 0.081              | 0.809 |
| No                                    | 92.6 (91.2 ~ 94.0) | 17.4 (16.8 ~ 18.0) | 19.1 (18.7 ~ 19.4) | 19.2 (18.9 ~ 19.5) | 18.7 (18.2 ~ 19.2) | 18.3 (17.8 ~ 18.8) |       |
| Yes                                   | 90.6 (87.1 ~ 94.1) | 17.4 (16.0 ~ 18.7) | 18.4 (17.5 ~ 19.3) | 19.1 (18.6 ~ 19.7) | 17.6 (16.4 ~ 18.9) | 18.1 (17.2 ~ 19.1) |       |

|                                 |                       |                       |                       |                       |                       |                       |
|---------------------------------|-----------------------|-----------------------|-----------------------|-----------------------|-----------------------|-----------------------|
| Pain VAS on                     | 0.006                 | 0.853                 | 0.054                 | 0.001                 | 0.020                 | 0.067                 |
| POD1                            |                       |                       |                       |                       |                       |                       |
| Mild (1-4)                      | 93.1 (91.7<br>~ 94.5) | 17.4 (16.8<br>~18.0)  | 19.1 (18.8<br>~19.5)  | 19.4 (19.1<br>~ 19.7) | 18.8 (18.3<br>~ 19.3) | 18.4 (18.0<br>~18.9)  |
| Moderate<br>(5-6)/Severe (7-10) | 89.0 (86.7<br>~ 91.3) | 17.3 (16.3<br>~ 18.3) | 18.3 (17.2<br>~ 19.4) | 18.4 (18.0<br>~ 18.8) | 17.5 (16.3<br>~ 18.7) | 17.5 (16.4<br>~ 18.6) |
| Postoperative LOS               | 0.219                 | 0.971                 | 0.017                 | 0.829                 | 0.045                 | 0.837                 |
| (d)                             |                       |                       |                       |                       |                       |                       |
| ≤4                              | 93.1 (91.0<br>~ 95.2) | 17.4 (16.6<br>~ 18.2) | 19.4 (19.0<br>~ 19.8) | 19.2 (18.7<br>~ 19.6) | 19.0 (18.4<br>~ 19.6) | 18.2 (17.4<br>~ 19.0) |
| >4                              | 91.5 (90.0<br>~ 93.2) | 17.4 (16.7<br>~ 18.1) | 18.6 (18.0<br>~ 19.1) | 19.2 (18.9<br>~ 19.5) | 18.1 (17.4<br>~ 18.8) | 18.3 (17.8<br>~ 18.8) |

---

ASA = American Society of Anesthesiologists', DVT = deep vein thrombosis, LOS = length of stay, POD = postoperative day, PONV = postoperative nausea and vomiting, VAS = visual analog scale

---
